# Supplementary material for: H-shift and cyclization reactions in unsaturated alkylperoxy radicals near room temperature: propagating or terminating autoxidation?
Source: Royal Society of Chemistry journal article supplement (doi:10.1039/d4cp02718c), 2024-01-01
Supplement: d4cp02718c1.pdf [file d4cp02718c1.pdf]

SUPPORTING INFORMATION

---

Supporting Information  
©Wiley-VCH 2021  
69451 Weinheim, Germany

**H-shift and Cyclisation Reactions in Unsaturated Alkylperoxy Radicals near Room Temperature: propagating or terminating autoxidation ?**

Barbara Nozière,\* and Luc Vereecken\*

## Table of Contents

|                                                                                                            |           |
|------------------------------------------------------------------------------------------------------------|-----------|
| <b>Figure S1. Schematics of the experimental set-up</b> .....                                              | <b>3</b>  |
| <b>Table S2. List of the experiments</b> .....                                                             | <b>4</b>  |
| <b>Section S3. Kinetic profiles and analysis</b> .....                                                     | <b>5</b>  |
| <b>Section S4. Kinetic modeling</b> .....                                                                  | <b>9</b>  |
| <b>Table S4. List of the reactions and rate coefficients used in the kinetic modeling</b> .....            | <b>9</b>  |
| <b>Section S5. Mass spectra and main ions detected in the experiments</b> .....                            | <b>11</b> |
| <b>Section S6. Mechanistic considerations</b> .....                                                        | <b>19</b> |
| <b>Decomposition of c-QO<sub>2</sub> and formation of acrolein</b> .....                                   | <b>19</b> |
| <b>Formation of unsaturated cyclo-ethers, carbonyls, alcohols, or epoxides</b> .....                       | <b>20</b> |
| Mechanism A: carbonyl channel in primary RO <sub>2</sub> +RO <sub>2</sub> .....                            | 21        |
| Mechanism B: cycloether+OH formation from HOOQ .....                                                       | 21        |
| Mechanism C: cyclisation of primary alkoxy radicals, followed by HO <sub>2</sub> elimination .....         | 22        |
| Mechanism D: cyclisation of hydroperoxyalkoxy radical HOOQO, followed by HO <sub>2</sub> elimination ..... | 24        |
| Mechanism E: unknown subsequent chemistry of (HOO) <sub>2</sub> QO <sub>2</sub> .....                      | 24        |
| Mechanism F: Chemistry induced by protonation in the ionization chamber .....                              | 25        |
| <b>Formation of alkylhydroperoxides, CH<sub>3</sub>OOH and C<sub>2</sub>H<sub>5</sub>OOH</b> .....         | <b>25</b> |
| <b>1-butenyl-O<sub>2</sub> annotated mechanism</b> .....                                                   | <b>27</b> |
| <b>1-pentenyl-O<sub>2</sub> annotated mechanism</b> .....                                                  | <b>28</b> |
| <b>1-hexenyl-O<sub>2</sub> annotated mechanism</b> .....                                                   | <b>31</b> |
| <b>2-Me-2-pentenyl-O<sub>2</sub> annotated mechanism</b> .....                                             | <b>33</b> |
| <b>Section S7. Rate coefficients from theoretical calculations</b> .....                                   | <b>34</b> |
| <b>Table S7.1</b> .....                                                                                    | <b>34</b> |
| <b>Table S7.2.</b> .....                                                                                   | <b>35</b> |
| <b>Section S8. References</b> .....                                                                        | <b>36</b> |

Figure S1. Schematics of the experimental set-up

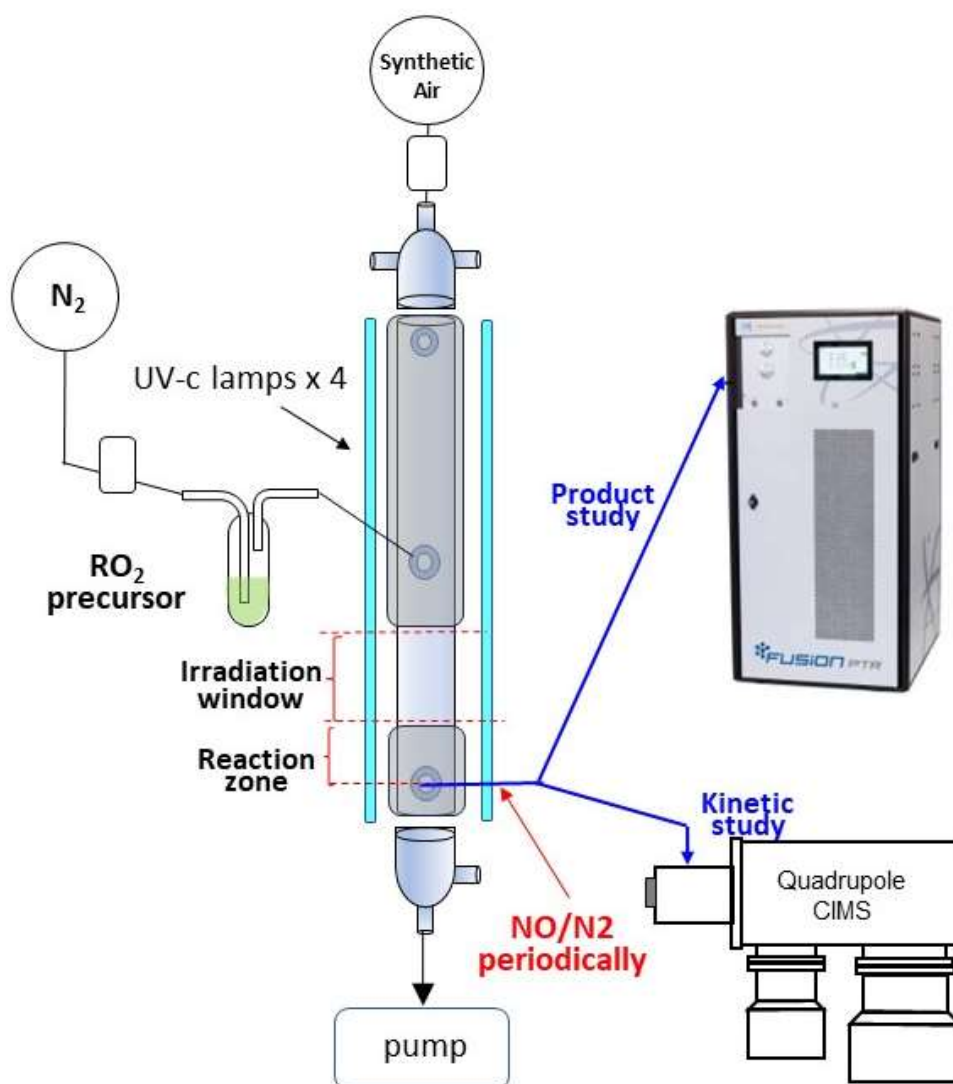

## SUPPORTING INFORMATION

Table S2. List of the experiments

| Date                                                                                                                       | [precursor] (ppm) | Fair (sLm) | $t_{\text{reac}}$ (s) | Type of experiment |
|----------------------------------------------------------------------------------------------------------------------------|-------------------|------------|-----------------------|--------------------|
| <b>1-butenylO<sub>2</sub>, *<math>[\text{RO}_2]_0 = 4.8 \text{ ppb} (1.2 \times 10^{11} \text{ cm}^{-3})</math></b>        |                   |            |                       |                    |
| 19/05/23                                                                                                                   | 1.1               | 3          | 1.4                   | Kinetics           |
| 22/05/23                                                                                                                   | 1.1               | 3          | 1.4                   | Kinetics           |
| 29/05/23                                                                                                                   | 1.1               | 3          | 0.7 - 1.0             | Kinetics           |
| 30/05/23                                                                                                                   | 1.1               | 3          | 0.3 - 2.4             | Kinetics           |
| 31/05/23                                                                                                                   | 1.1               | 3          |                       | Calibration        |
| 21/06/23                                                                                                                   | 1.6               | 3          | 0.5                   | Kinetics           |
| 22/06/23                                                                                                                   | 2.2               | 3          | 0.3 - 0.5             | Kinetics           |
| 26/06/23                                                                                                                   | 2.2               | 3          | 0.3                   | Product study      |
| <b>1-pentenylO<sub>2</sub>, *<math>[\text{RO}_2]_0 = 1.5 \text{ ppb} (3.8 \times 10^{10} \text{ cm}^{-3})</math></b>       |                   |            |                       |                    |
| 30/06/23                                                                                                                   | 0.05              | 3          | 0.3                   | Kinetics           |
| 05/07/23                                                                                                                   | 0.05              | 3          | 0.3                   | Kinetics           |
| 10/07/23                                                                                                                   | 0.05              | 3          | 0.7-1.1               | Kinetics           |
| 13/07/23                                                                                                                   | 0.05              | 3          | 0.3 - 1.1             | Kinetics           |
| 01/08/23                                                                                                                   | 0.05              | 3          |                       | Product study      |
| <b>1-hexenylO<sub>2</sub>, *<math>[\text{RO}_2]_0 = 2.2 \text{ ppb} (5.5 \times 10^{10} \text{ cm}^{-3})</math></b>        |                   |            |                       |                    |
| 11/04/23                                                                                                                   | 0.9               | 3.75       | 0.1                   | Kinetics           |
| 13/04/23                                                                                                                   | 1.1               | 2.5        | 3.6                   | Kinetics           |
| 14/04/23                                                                                                                   | 0.8 - 1.8         | 1.4 - 3.2  | 1.3 - 6.2             | Kinetics           |
| 17/04/23                                                                                                                   | 1.3               | 1.1        | 0.1                   | Kinetics           |
| 19/04/23                                                                                                                   | 0.6               | 1.1        | 0.1 - 8.7             | Kinetics           |
| 24/04/23                                                                                                                   | 0.2               | 3          | 3.2                   | Kinetics           |
| 25/04/23                                                                                                                   | 0.3               | 3          | 0.3 - 6.8             | Kinetics           |
| 04/05/23                                                                                                                   | 1.0               | 1          | 3.8 - 9.0             | Kinetics           |
| 10/05/23                                                                                                                   | 0.8               | 3          | 0.5 - 4.9             | Kinetics           |
| 12/05/23                                                                                                                   | 0.8               | 3          | 1.4 - 8.4             | Kinetics           |
| 17/05/23                                                                                                                   | 0.8               | 3          | 3.5                   | Calibration        |
| 27/06/23                                                                                                                   | 0.8               | 3          | 1.5                   | Product study      |
| <b>2 methyl 2-pentenylO<sub>2</sub>, *<math>[\text{RO}_2]_0 = 0.3 \text{ ppb} (7.1 \times 10^9 \text{ cm}^{-3})</math></b> |                   |            |                       |                    |
| 14/07/23                                                                                                                   | 8.7 -10.4         | 2.5 - 3    | 0.3 - 0.4             | Kinetics           |
| 17/07/23                                                                                                                   | 10.2 - 15.1       | 1 - 2      | 0.4 - 1.7             | Kinetics           |
| 25/07/23                                                                                                                   | 18.3              | 1          | 1.65                  | Product study      |

\*Typical concentration estimated at the entrance of the reaction zone.

## SUPPORTING INFORMATION

## Section S3. Kinetic profiles and analysis

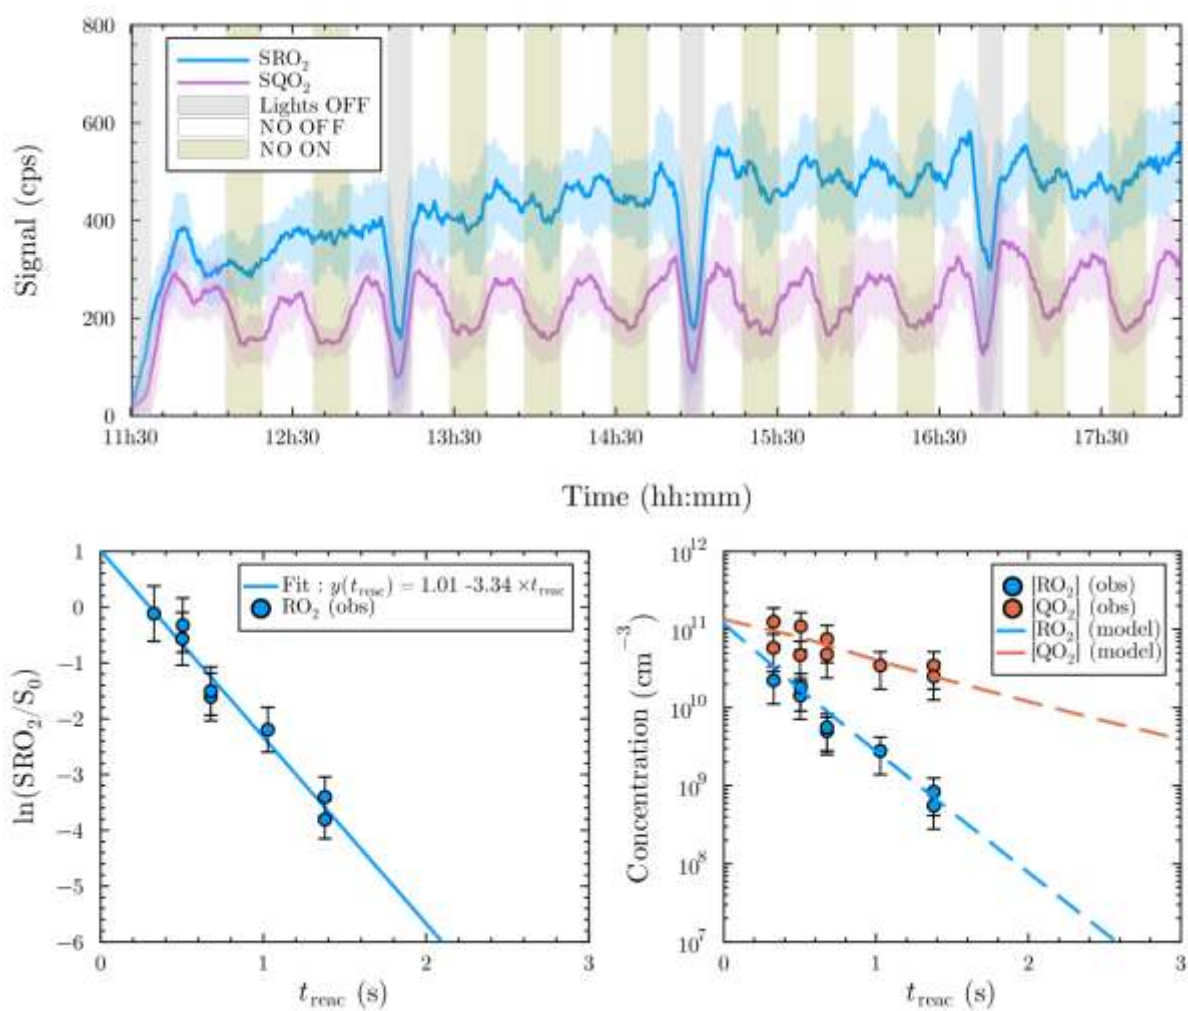

**Figure S3.1:** Kinetic analysis for 1-butenyl-O<sub>2</sub>. Top: Experimental profiles, blue line = RO<sub>2</sub>, pink line = c-QO<sub>2</sub>; Middle: linear regression on the overall RO<sub>2</sub> decay; Bottom: comparison with the kinetic model.

## SUPPORTING INFORMATION

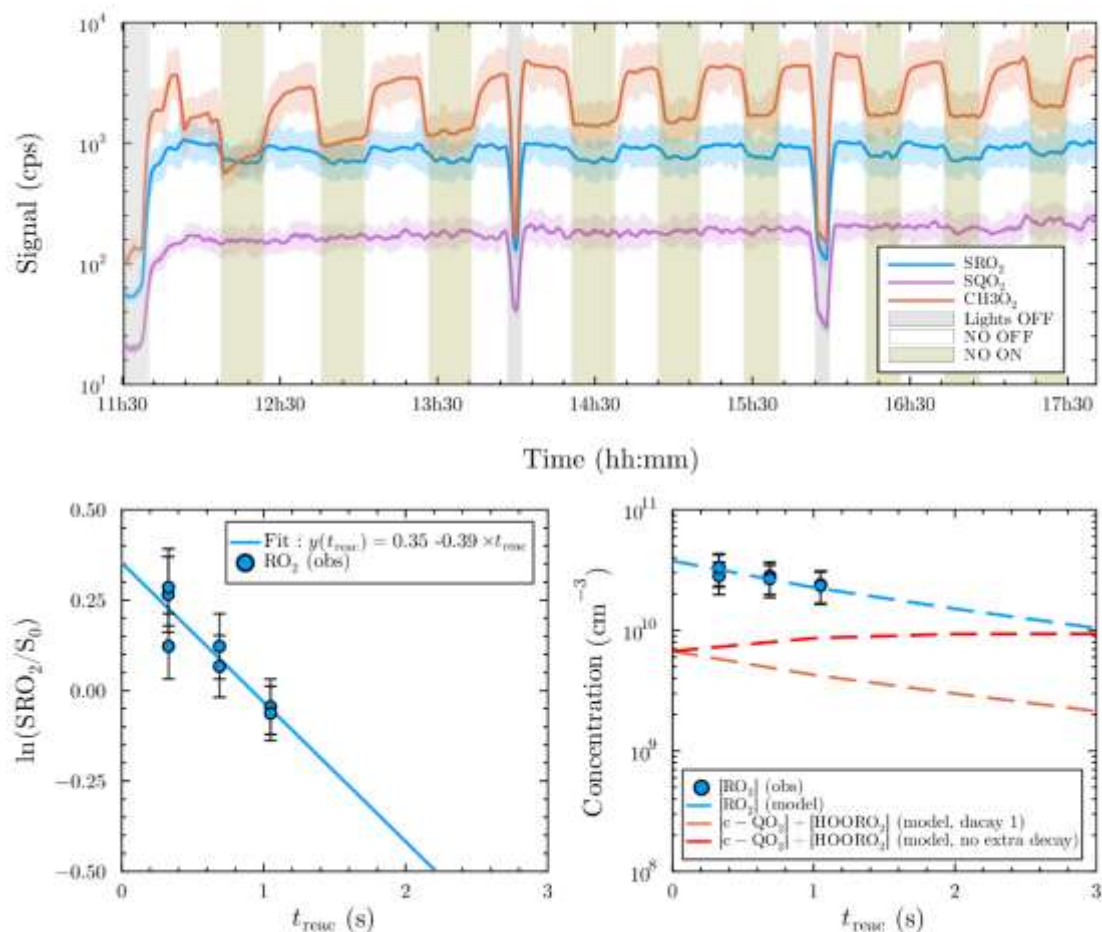

**Figure S3.2:** Kinetic analysis for 1-pentenyl-O<sub>2</sub>. Top: Experimental profiles: blue line = RO<sub>2</sub>, pink line = c-QO<sub>2</sub> + sum of all HOOQO<sub>2</sub>, red line = CH<sub>3</sub>O<sub>2</sub>; Middle: linear regression on the RO<sub>2</sub> overall decay; Bottom: comparison with the kinetic model.

## SUPPORTING INFORMATION

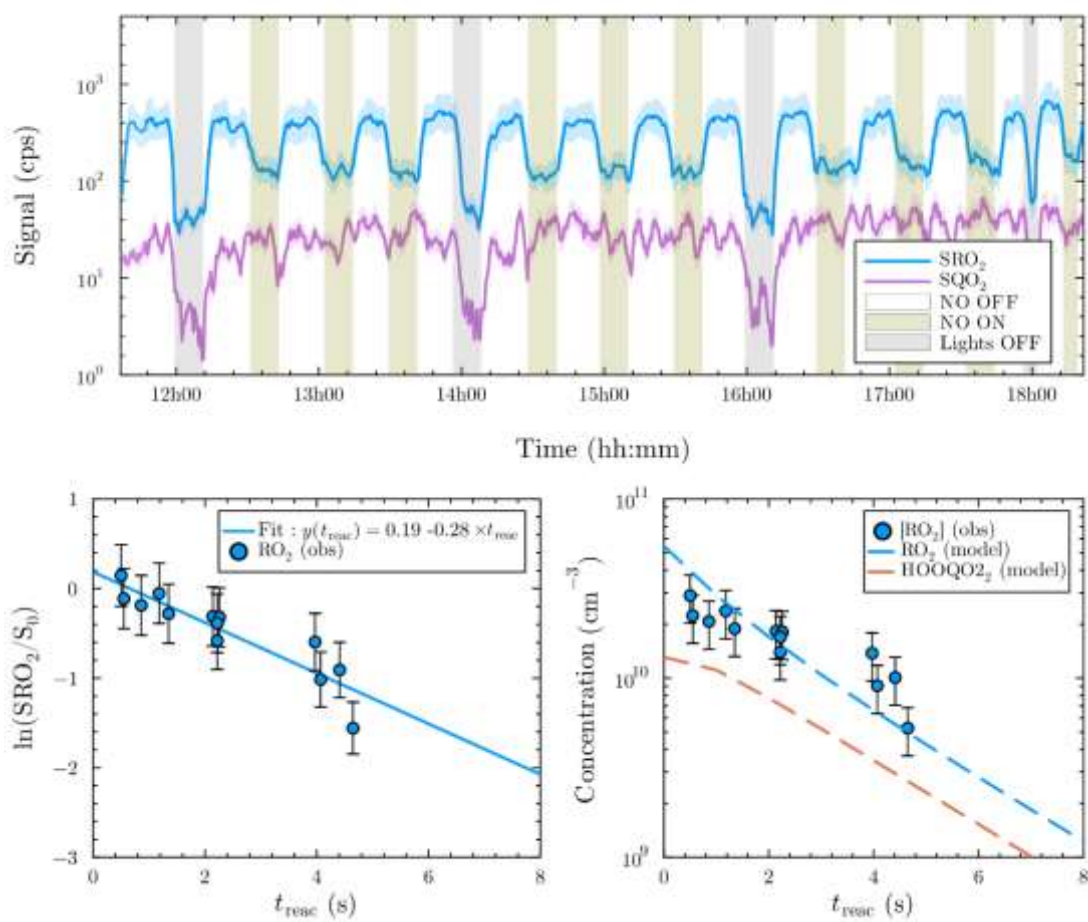

**Figure S3.3:** Kinetic analysis for 1-hexenyl-O<sub>2</sub>; Top: Experimental profiles; blue line = RO<sub>2</sub>, pink line = sum of all HOOQO<sub>2</sub>; Middle: linear regression on the overall RO<sub>2</sub> decay; Bottom: comparison with the kinetic model.

## SUPPORTING INFORMATION

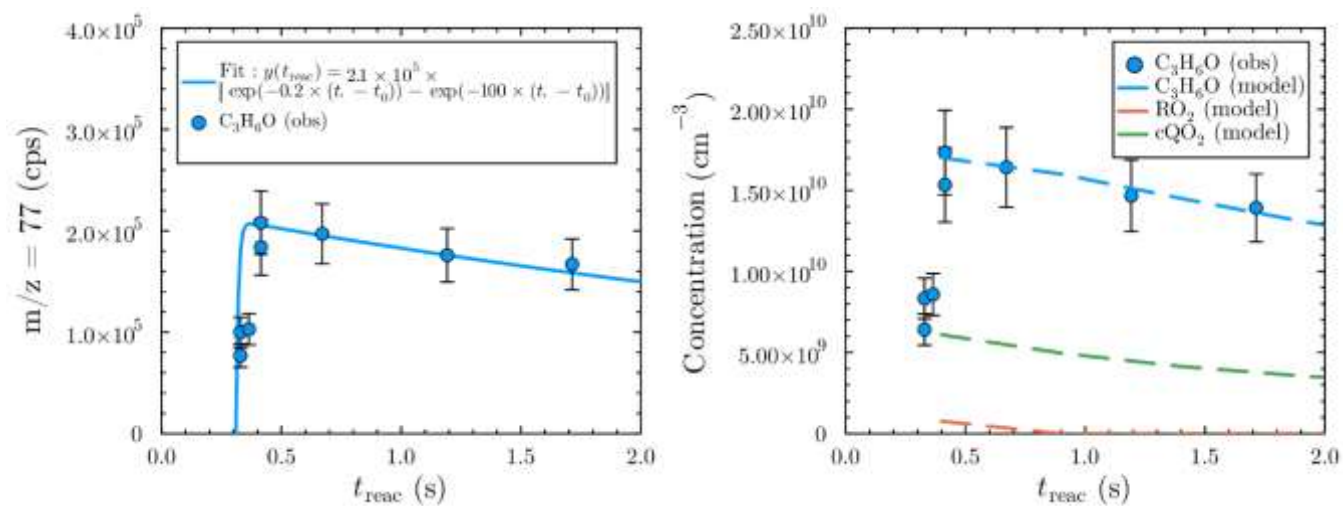

Figure S3.4: Kinetic analysis for 2-methyl-2-pentyl peroxy.



## SUPPORTING INFORMATION

## Section S4. Kinetic modeling

Kinetic modeling was performed using the ChemSimul V3.90 software to calculate the RO<sub>2</sub>, HOOQO<sub>2</sub> and c-QO<sub>2</sub> concentrations and compare them with the observed time profiles. These simulations also allowed to estimate the contributions of bimolecular and other reactions to the overall RO<sub>2</sub> decays in the kinetic analysis. The modeling was performed in two steps: first, the concentrations of RO<sub>2</sub>, HOOQO<sub>2</sub> and c-QO<sub>2</sub> produced photolytically in the irradiation region were determined. In a second step these predicted concentrations were used as initial values to simulate the reactions taking place in the reaction region in the dark.

Table S4. List of the reactions and rate coefficients used in the kinetic modeling

| Reaction                                                                                  | units                           | 1-butenyl-O <sub>2</sub>                           | 1-pentenyl-O <sub>2</sub>                                                                                                                            | 1-hexenyl-O <sub>2</sub>                                                             | 2-methyl-2-pentenyl-O <sub>2</sub>                |
|-------------------------------------------------------------------------------------------|---------------------------------|----------------------------------------------------|------------------------------------------------------------------------------------------------------------------------------------------------------|--------------------------------------------------------------------------------------|---------------------------------------------------|
| (1) R-I + hν → R + I                                                                      | s <sup>-1</sup>                 | 2 × 10 <sup>-2*</sup>                              | 2 × 10 <sup>-2*</sup>                                                                                                                                | 2 × 10 <sup>-2*</sup>                                                                | /                                                 |
| (1b) R-Br + hν → R + Br                                                                   | s <sup>-1</sup>                 | /                                                  | /                                                                                                                                                    | /                                                                                    | 2 × 10 <sup>-3 (a)</sup>                          |
| (2) O <sub>2</sub> + hν → O + O                                                           | s <sup>-1</sup>                 | 2 × 10 <sup>-9 (b)</sup>                           | 2 × 10 <sup>-9 (b)</sup>                                                                                                                             | 2 × 10 <sup>-9 (b)</sup>                                                             | 2 × 10 <sup>-9 (b)</sup>                          |
| (3) RO <sub>2</sub> + hν → RO + O                                                         | s <sup>-1</sup>                 | 2 × 10 <sup>-3 (c)</sup>                           | 2 × 10 <sup>-3 (c)</sup>                                                                                                                             | 2 × 10 <sup>-3 (c)</sup>                                                             | 2 × 10 <sup>-3 (c)</sup>                          |
| (4) HOOQO <sub>2</sub> / c-QO <sub>2</sub> + hν → HOOQO / c-QO + O                        | s <sup>-1</sup>                 | 2 × 10 <sup>-3 (c)</sup>                           | 2 × 10 <sup>-3 (c)</sup>                                                                                                                             | 2 × 10 <sup>-3 (c)</sup>                                                             | 2 × 10 <sup>-3 (c)</sup>                          |
| (5) HO <sub>2</sub> + hν → OH + O                                                         | s <sup>-1</sup>                 | 2 × 10 <sup>-3 (c)</sup>                           | 2 × 10 <sup>-3 (c)</sup>                                                                                                                             | 2 × 10 <sup>-3 (c)</sup>                                                             | 2 × 10 <sup>-3 (c)</sup>                          |
| (6) O <sub>3</sub> → O <sub>2</sub> + O                                                   | s <sup>-1</sup>                 | 0.2                                                | 0.2                                                                                                                                                  | 0.2                                                                                  | 0.2                                               |
| (7) H <sub>3</sub> CC(O)CH <sub>3</sub> → CH <sub>3</sub> + H <sub>3</sub> CC(O)          | s <sup>-1</sup>                 |                                                    |                                                                                                                                                      |                                                                                      | 0.1                                               |
| (8) ROOR' + hν → RO + OR'                                                                 | s <sup>-1</sup>                 | 4 × 10 <sup>-4 (d)</sup>                           | /                                                                                                                                                    | /                                                                                    | 4 × 10 <sup>-4 (d)</sup>                          |
| (9) ROOH (incl HOOQO <sub>2</sub> ) + hν → RO + OH                                        | s <sup>-1</sup>                 |                                                    | 4 × 10 <sup>-4 (e)</sup>                                                                                                                             | 4 × 10 <sup>-4 (e)</sup>                                                             |                                                   |
| (10) R + O <sub>2</sub> + M → RO <sub>2</sub> + M                                         | cm <sup>3</sup> s <sup>-1</sup> | 5 × 10 <sup>-12 (f)</sup>                          | 5 × 10 <sup>-12 (f)</sup>                                                                                                                            | 5 × 10 <sup>-12 (f)</sup>                                                            | 5 × 10 <sup>-12 (f)</sup>                         |
| (11) O <sub>2</sub> + O + M → O <sub>3</sub> + M                                          | cm <sup>3</sup> s <sup>-1</sup> | 1.4 × 10 <sup>-14 (g)</sup>                        | 1.4 × 10 <sup>-14 (g)</sup>                                                                                                                          | 1.4 × 10 <sup>-14 (g)</sup>                                                          | 1.4 × 10 <sup>-14 (g)</sup>                       |
| (12) RO <sub>2</sub> + RO <sub>2</sub> → 2 RO + O <sub>2</sub> / RH + R=O                 | cm <sup>3</sup> s <sup>-1</sup> | 6.7 × 10 <sup>-13 (h)</sup>                        | 1.1 × 10 <sup>-12 (h)</sup>                                                                                                                          | 1.4 × 10 <sup>-12 (h)</sup>                                                          | 1.4 × 10 <sup>-12 (h)</sup>                       |
| (13) HOOQO <sub>2</sub> (or c-QO <sub>2</sub> ) + HOOQO <sub>2</sub> → products           | cm <sup>3</sup> s <sup>-1</sup> | 6.2 × 10 <sup>-12 (h)</sup>                        | cQO <sub>2</sub> : 6.7 × 10 <sup>-12</sup><br>HOOQO <sub>2</sub> :<br>3.8 × 10 <sup>-12</sup> (prim)<br>8.0 × 10 <sup>-14</sup> (sec) <sup>(h)</sup> | 4.1 × 10 <sup>-12</sup><br>(prim)<br>3.7 × 10 <sup>-13</sup><br>(sec) <sup>(h)</sup> | 7.9 × 10 <sup>-15</sup><br>(tert) <sup>(h)</sup>  |
| (14) RO <sub>2</sub> + HOOQO <sub>2</sub> or c-QO <sub>2</sub> → products                 | cm <sup>3</sup> s <sup>-1</sup> | 2.0 × 10 <sup>-12 (h)</sup>                        | 1.2 × 10 <sup>-12</sup><br>(avg) <sup>(h,k)</sup>                                                                                                    | 1.3 × 10 <sup>-12</sup><br>(avg) <sup>(h,k)</sup>                                    | 1.1 × 10 <sup>-13 (h)</sup>                       |
| (15) RO + O <sub>2</sub> → R=O + HO <sub>2</sub>                                          | cm <sup>3</sup> s <sup>-1</sup> | 1 × 10 <sup>-14 (f)</sup>                          | 1 × 10 <sup>-14 (f)</sup>                                                                                                                            | 1 × 10 <sup>-14 (f)</sup>                                                            | 1 × 10 <sup>-14 (f)</sup>                         |
| (16) HOOQO <sub>2</sub> or c-QO <sub>2</sub> + O <sub>2</sub> → product + HO <sub>2</sub> | cm <sup>3</sup> s <sup>-1</sup> | 1 × 10 <sup>-14 (f)</sup>                          | 1 × 10 <sup>-14 (f)</sup>                                                                                                                            | 1 × 10 <sup>-14 (f)</sup>                                                            | 1 × 10 <sup>-14 (f)</sup>                         |
| (17) RO <sub>2</sub> + HO <sub>2</sub> → ROOH + O <sub>2</sub>                            | cm <sup>3</sup> s <sup>-1</sup> | 1 × 10 <sup>-11 (f)</sup>                          | 1 × 10 <sup>-11 (f)</sup>                                                                                                                            | 1 × 10 <sup>-11 (f)</sup>                                                            | 1 × 10 <sup>-11 (f)</sup>                         |
| (18) HOOQO <sub>2</sub> + HO <sub>2</sub> → products                                      | cm <sup>3</sup> s <sup>-1</sup> | 1 × 10 <sup>-11 (f)</sup>                          | 1 × 10 <sup>-11 (f)</sup>                                                                                                                            | 1 × 10 <sup>-11 (f)</sup>                                                            | 1 × 10 <sup>-11 (f)</sup>                         |
| (19) RO <sub>2</sub> → HOOQO <sub>2</sub> or c-QO <sub>2</sub>                            | s <sup>-1</sup>                 | 3.5 <sup>(l)</sup>                                 | 0.3 <sup>(l)</sup>                                                                                                                                   | 0.3 <sup>(l)</sup>                                                                   | 250 <sup>(l)</sup>                                |
| (20) RO <sub>2</sub> → walls                                                              | s <sup>-1</sup>                 | 3 × 10 <sup>-3 (m)</sup>                           | 3 × 10 <sup>-3 (m)</sup>                                                                                                                             | 3 × 10 <sup>-3 (m)</sup>                                                             | 3 × 10 <sup>-3 (m)</sup>                          |
| (21) HOOQO <sub>2</sub> or c-QO <sub>2</sub> → products                                   | s <sup>-1</sup>                 | 1.2 × 10 <sup>-2 (i)</sup> /<br>1.0 <sup>(l)</sup> | 10 <sup>(i)</sup> , HOOQO <sub>2</sub><br>/ 1 (c-QO <sub>2</sub> ) <sup>(l)</sup>                                                                    | 2.5 <sup>(i)</sup> / 1 <sup>(l)</sup>                                                | 3.4 × 10 <sup>-2 (i)</sup> /<br>25 <sup>(l)</sup> |
| (22) unsaturated RH or RI + O → R'=O + R''-I                                              | cm <sup>3</sup> s <sup>-1</sup> | 2 × 10 <sup>-10 (n)</sup>                          | 2 × 10 <sup>-10 (n)</sup>                                                                                                                            | 2 × 10 <sup>-10 (n)</sup>                                                            | 2 × 10 <sup>-10 (n)</sup>                         |
| (23) I + O <sub>3</sub> → IO + O <sub>2</sub>                                             | cm <sup>3</sup> s <sup>-1</sup> | 1.4 × 10 <sup>-12 (o)</sup>                        | 1.4 × 10 <sup>-12 (o)</sup>                                                                                                                          | 1.4 × 10 <sup>-12 (o)</sup>                                                          | /                                                 |
| (24) Br + O <sub>3</sub> → BrO + O <sub>2</sub>                                           | cm <sup>3</sup> s <sup>-1</sup> | /                                                  | /                                                                                                                                                    | /                                                                                    | 1.2 × 10 <sup>-12 (o)</sup>                       |
| (25) IO + RO <sub>2</sub> → RO + I + O <sub>2</sub> (25%)                                 | cm <sup>3</sup> s <sup>-1</sup> | 2 × 10 <sup>-11 (p)</sup>                          | 2 × 10 <sup>-11 (p)</sup>                                                                                                                            | 2 × 10 <sup>-11 (p)</sup>                                                            | /                                                 |
| (26) BrO + RO <sub>2</sub> → RO + Br + O <sub>2</sub> (25%)                               | cm <sup>3</sup> s <sup>-1</sup> | /                                                  | /                                                                                                                                                    | /                                                                                    | 6 × 10 <sup>-12 (p)</sup>                         |
| (27) IO + HO <sub>2</sub> → HO + I + O <sub>2</sub>                                       | cm <sup>3</sup> s <sup>-1</sup> | 8.4 × 10 <sup>-11 (o)</sup>                        | 8.4 × 10 <sup>-11 (o)</sup>                                                                                                                          | 8.4 × 10 <sup>-11 (o)</sup>                                                          | /                                                 |
| (28) IO + O <sub>3</sub> → I + 2 O <sub>2</sub>                                           | cm <sup>3</sup> s <sup>-1</sup> | < 1 × 10 <sup>-15 (o)</sup>                        | < 1 × 10 <sup>-15 (o)</sup>                                                                                                                          | < 1 × 10 <sup>-15 (o)</sup>                                                          | /                                                 |
| (29) Br + R-C=C-R' →                                                                      | cm <sup>3</sup> s <sup>-1</sup> | /                                                  | /                                                                                                                                                    | /                                                                                    | 1 × 10 <sup>-13 (q)</sup>                         |

\*measured experimentally; <sup>(a)</sup> estimated from σ(5-Bromo-2-methyl-2-pentene) = 1 × 10<sup>-20</sup> cm<sup>2</sup>; <sup>(b)</sup> estimated from σ(O<sub>2</sub>) = 2.5 × 10<sup>-25</sup> cm<sup>2</sup>; <sup>(c)</sup> estimated assuming σ(RO<sub>2</sub>) ~ σ(HO<sub>2</sub>) = 1 × 10<sup>-19</sup> cm<sup>2</sup>; <sup>(d)</sup> estimated from σ(t-butylOO-t-butyl) = 2.5 × 10<sup>-20</sup> cm<sup>2</sup>; <sup>(e)</sup> estimated using σ(t-butylOOH) = 2.5 × 10<sup>-20</sup> cm<sup>2</sup>; <sup>(f)</sup> estimated from Ref.<sup>2</sup> for primary RO<sub>2</sub>; <sup>(g)</sup> Ref.<sup>3</sup>; <sup>(h)</sup> Ref.<sup>4</sup>, where it is assumed that a β-OOR or β-OOH substituent group has a similar effect as a β-OH group, and ignoring the presence of a ring; <sup>(i)</sup> from the SAR of Ref.<sup>5</sup>; <sup>(k)</sup> Geometric average of the rates for the various HOOQO<sub>2</sub>/c-QO<sub>2</sub> radicals; <sup>(l)</sup> adjusted to fit the observed kinetics (see text); <sup>(m)</sup> determined experimentally; <sup>(n)</sup> from Ref.<sup>2</sup> for CH<sub>4</sub>; <sup>(o)</sup> from ref<sup>6</sup> ;

## SUPPORTING INFORMATION

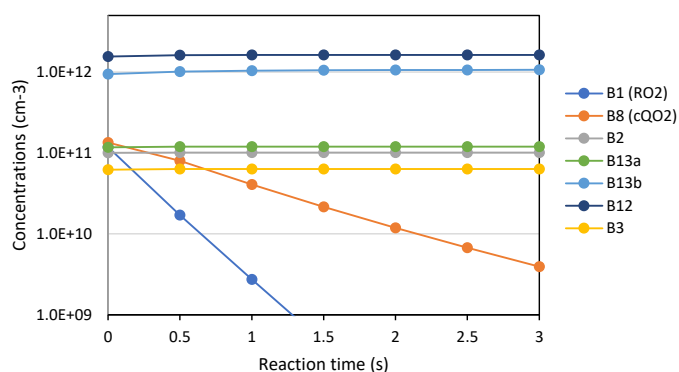

**Fig. S4.1:** Kinetic simulations for the 1-butenyl-O<sub>2</sub> system. B13a is the acrolein produced by the RO<sub>2</sub> self-reaction channel and B13b is that produced in the cyclisation channel.

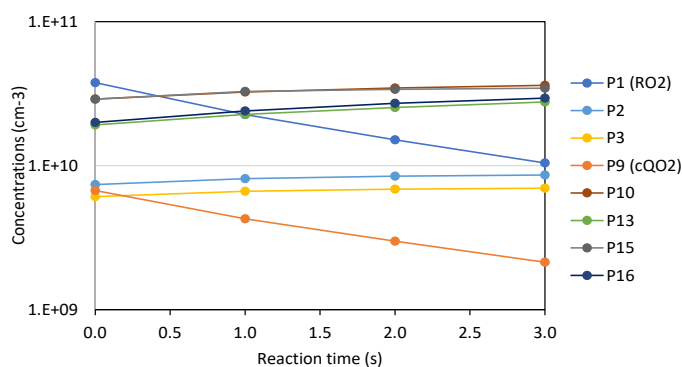

**Fig. S4.2:** Kinetic simulations for the 1-pentenyl-O<sub>2</sub> system.

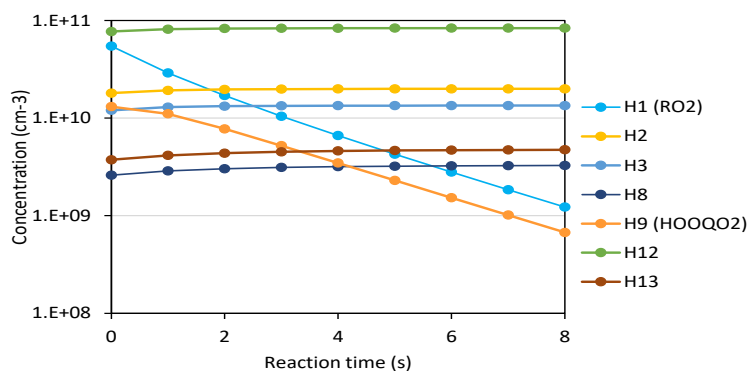

**Fig. S4.3:** Kinetic simulations for the 1-hexenyl-O<sub>2</sub> system.

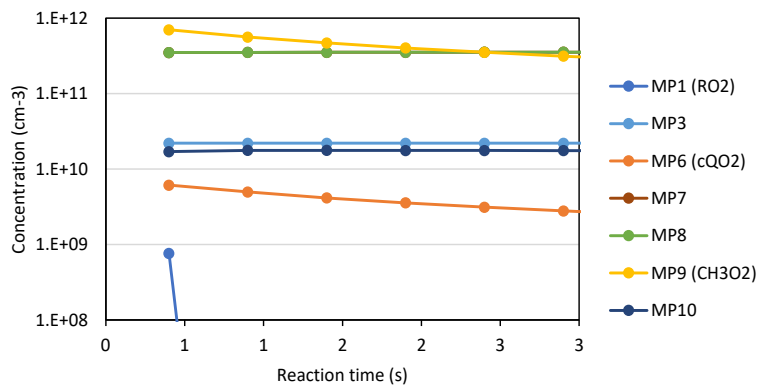

**Fig. S4.4:** Kinetic simulations for the 2-methyl-2-pentenyl-O<sub>2</sub> system (note that products MP7 and MP8 overlap).

## SUPPORTING INFORMATION

## Section S5. Mass spectra and main ions detected in the experiments

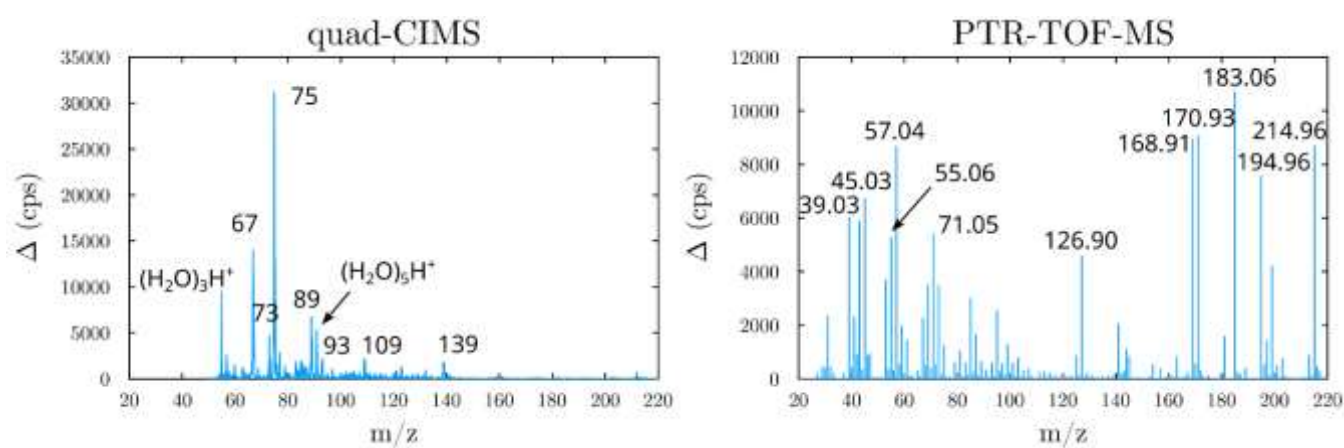

**Figure S5a:** Mass spectra for the 1-butenyl-O<sub>2</sub> system Left: CIMS analysis; Right: PTR-TOF-MS analysis

## SUPPORTING INFORMATION

**Table S5b:** List of the main ions (and intensities in Hz or cps) observed in the 1-butenyl-O<sub>2</sub> system.

| CIMS                                                                               | Ptr-tof-MS FUSION            | Proposed compound or ion                                                                                                                                                                                                                                                                                                                                                                                                                                                             | Product # in mechanism |
|------------------------------------------------------------------------------------|------------------------------|--------------------------------------------------------------------------------------------------------------------------------------------------------------------------------------------------------------------------------------------------------------------------------------------------------------------------------------------------------------------------------------------------------------------------------------------------------------------------------------|------------------------|
| 57/75/93<br>(2600/31000/2200)                                                      | 57/75 (22000/1000)           | C <sub>3</sub> H <sub>4</sub> O-H <sup>+</sup> <i>m/z</i> 57<br>C <sub>3</sub> H <sub>4</sub> O-(H <sub>2</sub> O)H <sup>+</sup> <i>m/z</i> 75<br>C <sub>3</sub> H <sub>4</sub> O acroleine                                                                                                                                                                                                       | B13                    |
| 67/85 (14000/1900)                                                                 | 31 (3200)                    | CH <sub>3</sub> OOH-H <sup>+</sup> <i>m/z</i> 49<br>CH <sub>3</sub> OOH-(H <sub>2</sub> O)H <sup>+</sup> <i>m/z</i> 67<br>CH <sub>3</sub> OOH-(H <sub>2</sub> O) <sub>2</sub> H <sup>+</sup> <i>m/z</i> 85<br>Detected as CH <sub>3</sub> O <sup>+</sup> , <i>m/z</i> 31 in PTR-tof-MS                                                                                                                                                                                               | Co-product B13         |
| 71/89 (700/6700)                                                                   | 71 (6100)                    | C <sub>4</sub> H <sub>6</sub> O-H <sup>+</sup> , <i>m/z</i> 71<br>C <sub>4</sub> H <sub>6</sub> O-(H <sub>2</sub> O)H <sup>+</sup> , <i>m/z</i> 89<br>                                                                                                                                                                                                                                             | B3                     |
| 73/91/109<br>(4000/5000/2100)<br><i>m/z</i> 73 and 91 overlap<br>with ion clusters | 73 (4200)<br>+ 55 (2600)     | C <sub>4</sub> H <sub>8</sub> O-H <sup>+</sup> , <i>m/z</i> 73<br>C <sub>4</sub> H <sub>8</sub> O-(H <sub>2</sub> O)H <sup>+</sup> , <i>m/z</i> 91<br>C <sub>4</sub> H <sub>8</sub> O-(H <sub>2</sub> O) <sub>2</sub> H <sup>+</sup> , <i>m/z</i> 109<br><br>Partly dehydrates into C <sub>4</sub> H <sub>6</sub> -H <sup>+</sup> , <i>m/z</i> 55<br>in PTR-tof-MS                                 | B2                     |
| 63 (1150)                                                                          | 45 (7200)                    | acetaldehyde                                                                                                                                                                                                                                                                                                                                                                                                                                                                         | ?                      |
| 103/121/139<br>(400/930/1800)                                                      | 103 (1000)<br>+<br>69 (5000) | C <sub>4</sub> H <sub>6</sub> O <sub>3</sub> -H <sup>+</sup> , <i>m/z</i> 103<br>C <sub>4</sub> H <sub>6</sub> O <sub>3</sub> -(H <sub>2</sub> O)H <sup>+</sup> , <i>m/z</i> 121<br>C <sub>4</sub> H <sub>6</sub> O <sub>3</sub> -(H <sub>2</sub> O) <sub>2</sub> H <sup>+</sup> , <i>m/z</i> 139<br><br>Partly detected as C <sub>4</sub> H <sub>5</sub> O <sup>+</sup> , <i>m/z</i> 69 in PTR- | B12                    |
|                                                                                    | 85 (3000)                    | tof-MS                                                                                                                                                                                                                                                                                                                                                                                           |                        |
| 83 (1800)                                                                          |                              | C <sub>4</sub> H <sub>4</sub> O <sub>2</sub> -H <sup>+</sup> , <i>m/z</i> 85<br>Unidentified product or ion fragment                                                                                                                                                                                                                                                                                                                                                                 |                        |
| 138/156/174<br>(total ~190)                                                        | /                            | C <sub>4</sub> H <sub>7</sub> O <sub>4</sub> (H <sub>2</sub> O)H <sup>+</sup> <i>m/z</i> 138<br>C <sub>4</sub> H <sub>7</sub> O <sub>4</sub> (H <sub>2</sub> O) <sub>2</sub> H <sup>+</sup> <i>m/z</i> 156.1<br>C <sub>4</sub> H <sub>7</sub> O <sub>4</sub> (H <sub>2</sub> O) <sub>3</sub> H <sup>+</sup> <i>m/z</i> 174.1<br><br>c-QO <sub>2</sub> ,                                          | B8                     |
| 106/124/142<br>(total ~130 Hz)                                                     | /                            | C <sub>4</sub> H <sub>7</sub> O <sub>2</sub> (H <sub>2</sub> O)H <sup>+</sup> : 106.1<br>C <sub>4</sub> H <sub>7</sub> O <sub>2</sub> (H <sub>2</sub> O) <sub>2</sub> H <sup>+</sup> : 124.1<br>C <sub>4</sub> H <sub>7</sub> O <sub>2</sub> (H <sub>2</sub> O) <sub>3</sub> H <sup>+</sup> : 142.1<br>RO <sub>2</sub> ,                                                                         | B1                     |

## SUPPORTING INFORMATION

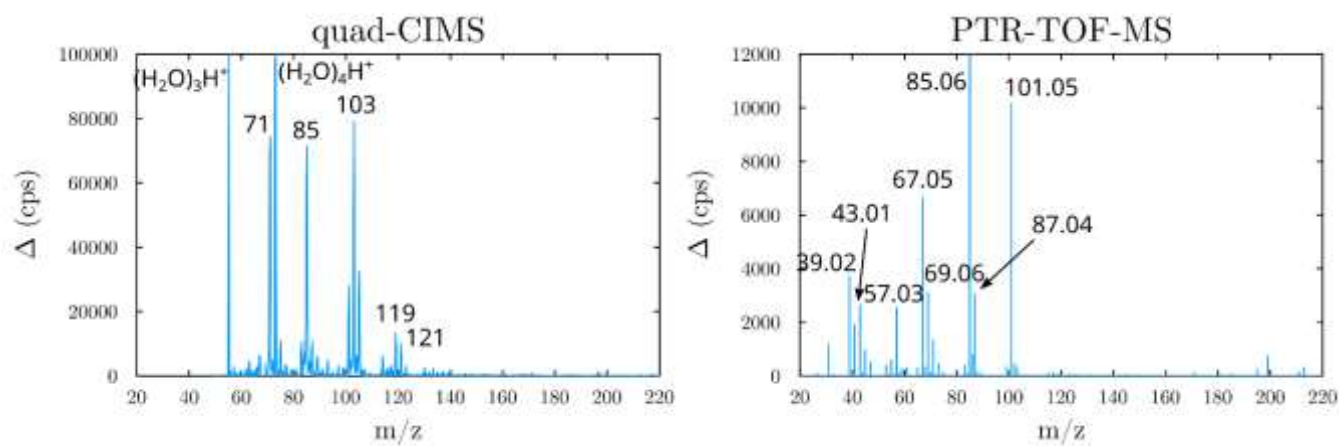

**Figure S5c:** Mass spectra for the 1-pentenyl-O<sub>2</sub> system. Left: CIMS analysis; Right: PTR-TOF-MS analysis

## SUPPORTING INFORMATION

**Table S5d:** List of the main ions identified (and intensities) in the 1-pentenyl-O<sub>2</sub> system.

| CIMS                              | Ptr-tof-MS FUSION           | Proposed compound or ion                                                                                                                                                                                                                                         | Product # in mechanism        |
|-----------------------------------|-----------------------------|------------------------------------------------------------------------------------------------------------------------------------------------------------------------------------------------------------------------------------------------------------------|-------------------------------|
| 85/103/121<br>(71000/79000/10000) | 85 (19000)                  | $C_5H_8O-H^+$ , $m/z$ 85<br>$C_5H_8O-(H_2O)H^+$ , $m/z$ 103<br>$C_5H_8O-(H_2O)_2H^+$ , $m/z$ 121<br>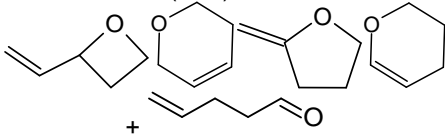                                                                           | P3, P10a, P10b,<br>P10c, P10d |
| 87/105/123<br>(10800/32000/1500)  | 87 (3100)<br>+<br>69 (3100) | $C_5H_{10}O-H^+$ , $m/z$ 87<br>$C_5H_{10}O-(H_2O)H^+$ , $m/z$ 105<br>$C_5H_{10}O-(H_2O)_2H^+$ , $m/z$ 123<br><br>Partly dehydrates into $C_5H_8^+$ , $m/z$ 69<br>in PTR-tof-MS | P2                            |
| 83/101/119<br>(10000/28000/13000) | 83/101 (400/10000)          | Fragmentation of ion $C_5H_8O_3-H^+$<br>$m/z$ 117<br><br>into $C_5H_7O^+$ , $m/z$ 83<br>  | P13                           |
| 66/84 (1900/7000)                 | /                           | $CH_3O_2$                                                                                                                                                                                                                                                        |                               |
| 71/89/107<br>(74000/5300/2000)    | 71 (1300)                   | $C_4H_6O-H^+$ , $m/z$ 71<br>$C_4H_6O-(H_2O)H^+$ , $m/z$ 89<br>$C_4H_6O-(H_2O)_2H^+$ , $m/z$ 107<br>                                                                          | P15                           |
| 67 (6200)                         | 67 (6600)                   | $C_5H_6-H^+$ , $m/z$ 67<br>Dehydration of ion $C_5H_8O-H^+$<br>                                                                                                              | P10a, P10b, P10c,<br>P10d     |
| 75/93 (10500/4900)                | 57 (2500)                   | $C_3H_4O-H^+$ , $m/z$ 57<br>$C_3H_4O-(H_2O)H^+$ , $m/z$ 75<br>$C_3H_4O$ acrolein                                                                                            | P16                           |
| 63/81/99<br>(4300/2000/2500)      | 45 (950)                    | $C_2H_5OOH-H^+$ , $m/z$ 63<br>$C_2H_5OOH-(H_2O)H^+$ , $m/z$ 81<br>$C_2H_5OOH-(H_2O)_2H^+$ , $m/z$ 99<br>Detected at $C_2H_5O^+$ , $m/z$ 45 in PRT-tof-MS                                                                                                         | Co-product P16                |
| 97 (3000)                         | 43 (2600)                   | Unidentified product or ion fragment                                                                                                                                                                                                                             |                               |
| 120/138/146<br>(total ~ 170)      | /                           | $C_5H_9O_2(H_2O)H^+$ = 120.1<br>$C_5H_9O_2(H_2O)_2H^+$ = 138.1<br>$C_5H_9O_2(H_2O)_3H^+$ = 156.1<br>$RO_2$ ,                                                                 | P1                            |

## SUPPORTING INFORMATION

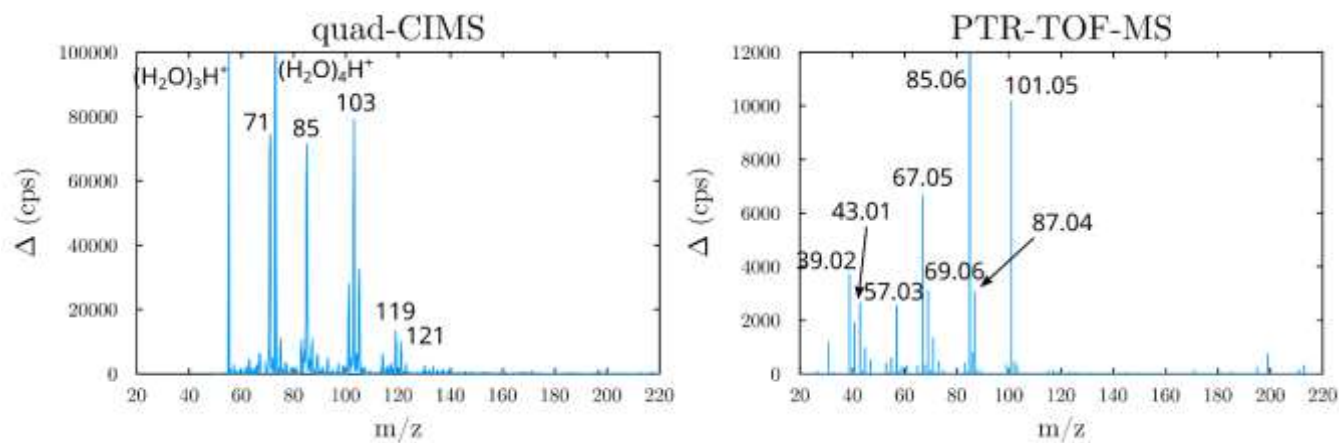

**Figure S5e:** Mass spectra for the 1-hexenyl-O<sub>2</sub> system. Left: CIMS analysis; Right: PTR-TOF-MS analysis

## SUPPORTING INFORMATION

**Table S5f:** List of the main ions identified in the 1-hexenyl-O<sub>2</sub> system.

| CIMS                         | Ptr-tof-MS FUSION   | Proposed compound or ion                                                                                                                                                                          | Product # in mechanism                      |
|------------------------------|---------------------|---------------------------------------------------------------------------------------------------------------------------------------------------------------------------------------------------|---------------------------------------------|
| 81 (21000)                   | 81 (26500)          | $C_6H_8H^+$<br>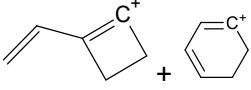<br>Dehydration of ion $C_6H_{10}O-H^+$                                                          | H8                                          |
| 99/117 (4600/8700)           | 99 (9600)           | $C_6H_{10}O-H^+$<br><br>Acetaldehyde                                                                            | H8, H3                                      |
| 63 (1600)                    | 45 (9500)           | Acetaldehyde                                                                                                                                                                                      |                                             |
| 97 (4000)                    | 97 (5300)           | $C_6H_8O-H^+$ unidentified compound                                                                                                                                                               |                                             |
| 75 (1300)                    | 57 (6600)           | $C_3H_4O-H^+$ , acrolein                                                                                                                                                                          | H13                                         |
| 85/103 (3600/600)            | 85 (3800)           | $C_5H_8O-H^+$ ,                                                                                                 | H12                                         |
| 101/119 (1500/3600)          | 82 /101 (3300/2700) | $C_5H_8O_2 -H^+$ , or                                                                                           | H2                                          |
| 67/85 (1600/3600)            | 67 (3800)           | $C_5H_6-H^+$ or $H_3COOH$                                                                                                                                                                         |                                             |
| 59 (600)                     | +31 (6200)          |                                                                                                                                                                                                   |                                             |
|                              | 59 (4700)           | $C_3H_6O-H^+$ acetone                                                                                                                                                                             |                                             |
| 79 (600)                     | 79 (4000)           | $C_6H_6-H^+$ unidentified compound                                                                                                                                                                | Fragment ion<br>H17a, H17b, H17c,<br>H17d ? |
| 69 (1500)                    | 69 (4000)           | $C_5H_8-H^+$ unidentified compound                                                                                                                                                                | Fragment ion<br>H17a, H17b, H17c,<br>H17d ? |
| 134/152/170<br>(total ~ 760) |                     | $C_6H_{11}O_2(H_2O)H^+ = 134.1$<br>$C_6H_{11}O_2(H_2O)_2H^+ = 152.1$<br>$C_6H_{11}O_2(HO_2)_3H^+ = 170.1$<br> | H1                                          |



## SUPPORTING INFORMATION

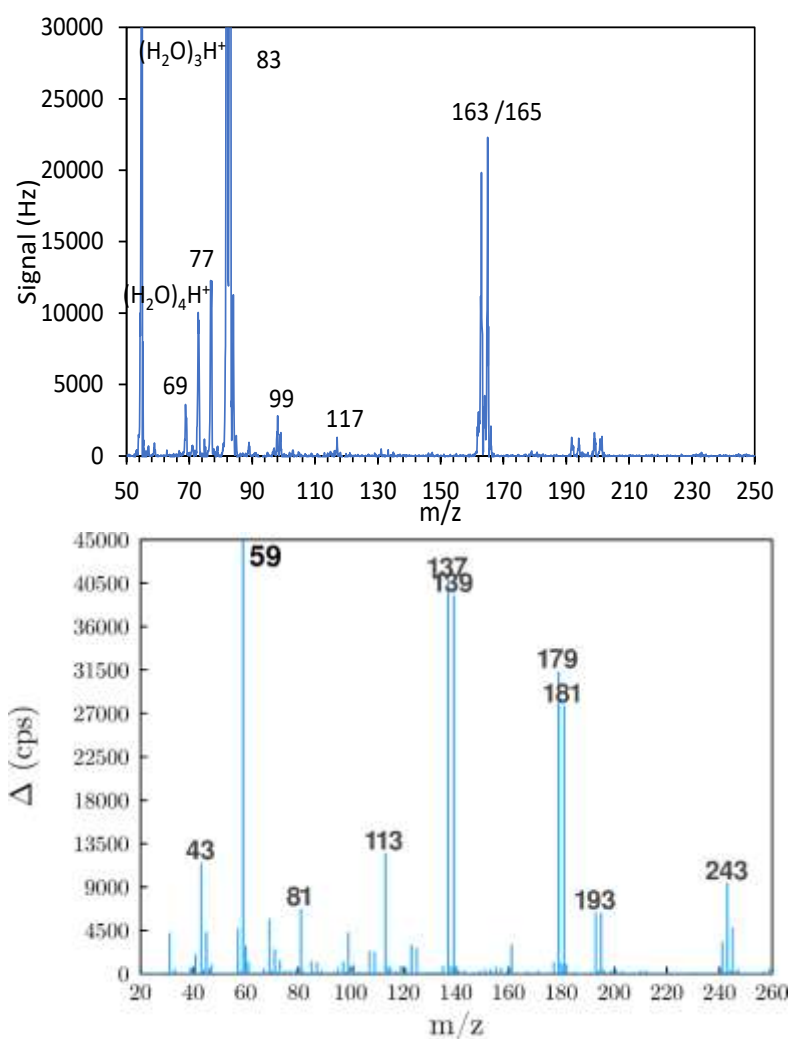

**Figure S5g:** Mass spectra for the 2-methyl-2-pentenyl-O<sub>2</sub> system. Top: CIMS analysis; Bottom: PTR-TOF-MS analysis

## SUPPORTING INFORMATION

**Table S5h:** List of the main ions identified in the 2-methyl-2-pentenyl-O<sub>2</sub> system.

| CIMS                          | Ptr-tof-MS FUSION | Proposed compound or ion                                                                                                                                                                                                                                                                                                                                     | Product # in mechanism |
|-------------------------------|-------------------|--------------------------------------------------------------------------------------------------------------------------------------------------------------------------------------------------------------------------------------------------------------------------------------------------------------------------------------------------------------|------------------------|
| 83 (82000)                    | /                 | In from brominated precursor +<br>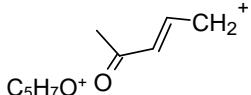<br>C <sub>5</sub> H <sub>7</sub> O <sup>+</sup><br>fragmentation of ion C <sub>5</sub> H <sub>8</sub> O <sub>3</sub> -H <sup>+</sup> ,<br><br>m/z 117 | MP8                    |
| 59/77 (900/12000)             | 59 (108000)       | C <sub>3</sub> H <sub>6</sub> O-H <sup>+</sup> acetone                                                                                                                                                                                                                                                                                                       | MP10                   |
| 163/165 (20000/20000)         | /                 | brominated precursor                                                                                                                                                                                                                                                                                                                                         |                        |
| /                             | 113 (12500)       | unidentified compound                                                                                                                                                                                                                                                                                                                                        |                        |
| 66/84 (50/11000)              | /                 | CH <sub>3</sub> O <sub>2</sub>                                                                                                                                                                                                                                                                                                                               | MP9                    |
| 69 (3500)                     | 69 (5600)         | C <sub>5</sub> H <sub>8</sub> -H <sup>+</sup> ion fragment                                                                                                                                                                                                                                                                                                   |                        |
| 57/75 (700/1100)              | 57 (4600)         | C <sub>3</sub> H <sub>4</sub> O-H <sup>+</sup> , acrolein                                                                                                                                                                                                                                                                                                    | MP7                    |
| 81 (900)                      | 81 (6700)         | C <sub>6</sub> H <sub>8</sub> -H <sup>+</sup> ion fragment                                                                                                                                                                                                                                                                                                   |                        |
| 99/117/135<br>(1600/1300/250) | 99 (4300)         | C <sub>6</sub> H <sub>10</sub> O-H <sup>+</sup> m/z 99<br>                                                                                                                                                                                                                 | MP3                    |
|                               | 45 (4300)         | ?                                                                                                                                                                                                                                                                                                                                                            |                        |
| 67/85 (350/1500)              | 31 (4200)         | H <sub>3</sub> COOH                                                                                                                                                                                                                                                                                                                                          |                        |

## SUPPORTING INFORMATION

## Section S6. Mechanistic considerations

In this section we examine some possible mechanisms that might be useful to explain the observations. In most cases we rely on theoretical calculations and/or available literature data, but this section remains highly speculative and should not be considered anything other than exploratory.

Decomposition of c-QO<sub>2</sub> and formation of acrolein

The experiments with 1-butenyl-O<sub>2</sub> and 2-Me-2-pentenyl-O<sub>2</sub> are both predicted to proceed by cyclisation to a five-membered cycloperoxide (shown in Scheme S6.1 for 1-butenyl-O<sub>2</sub>).

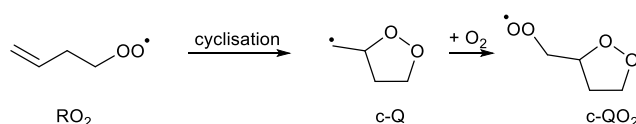

The product ions observed experimentally for these RO<sub>2</sub> suggest that the c-QO<sub>2</sub> formed from RO<sub>2</sub> ring closure might decompose into smaller products, such as acrolein and acetone. This is mostly based on the very intense signals observed for acrolein with 1-butenyl-O<sub>2</sub> (22000 – 31000 cps) and for acetone with 2-Me-2-pentenyl-O<sub>2</sub> ( $\geq$  12000 cps). Assuming typical detection sensitivities of  $\sim$  20000 cps/ppb for acrolein and 40000 cps/ppb for acetone these observed ion intensities correspond to  $\sim$  1 – 1.5 ppb of acrolein from 1-butenyl-O<sub>2</sub> (thus a yield of  $\sim$  33 - 50 %) and 0.3 ppb acetone from 2-Me-2-pentenyl-O<sub>2</sub> (thus a yield of  $\sim$  100 %). For 2-pentenyl-O<sub>2</sub>, only about half of the reaction flux is predicted to go through 6-membered cyclisation (see Table 1), but even for this radical the acrolein signal is much larger ( $\sim$ 10000 cps thus  $\sim$  0.5 ppb and a yield of 25 %) than with 1-hexenyl-O<sub>2</sub>, which is not expected to undergo cyclisation directly. For 1-hexenyl-O<sub>2</sub>, the much smaller acrolein signals observed (1300 cps with the CIMS, thus 0.065 ppb and 0.65 % of the initial RO<sub>2</sub>) could result from the cyclisation of the dominant HOOQO<sub>2</sub>, mostly to a 6-membered cycloperoxide HOO-c-QO<sub>2</sub> (see Fig. 5). In addition, the direct observation of the c-QO<sub>2</sub> with 1-butenyl-O<sub>2</sub> and of intense ion signals that can be attributed to the carbonyl product of the c-QO<sub>2</sub> with the other RO<sub>2</sub>, further support the fact that these c-QO<sub>2</sub> are indeed formed. Overall, this data suggests that the cyclic peroxide c-QO<sub>2</sub> formed from cyclisation readily dissociate, forming acrolein from the cyclic moiety, while the exo-cyclic moiety is converted to a carbonyl, e.g. through an alkoxy radical decomposition separating it from the ring (e.g. acetone with 2-methyl-2-pentenyl-O<sub>2</sub>).

The mechanism explaining such decomposition is unclear. Vereecken et al.<sup>7</sup> found that the ring closure process is near-energy neutral, such that no dominant chemically activated breaking of the weaker O–O bond (BDE 40-45 kcal/mol) in the c-Q alkyl radical is expected. Relative to collisional energy loss, the O<sub>2</sub> addition itself is moderately slow under atmospheric conditions,  $\sim$ 5 $\times$ 10<sup>7</sup> s<sup>-1</sup>,<sup>8</sup> further corroborating the thermalization of the c-Q. The O<sub>2</sub> addition forming c-QO<sub>2</sub> is exothermic by 30-35 kcal/mol, but our theoretical calculations show that O–O bond breaking in c-QO<sub>2</sub>, forming a tri-radical, is endothermic by about 30 kcal/mol even accounting for the release of ring strain in the 5-membered ring (Fig. S6.2).

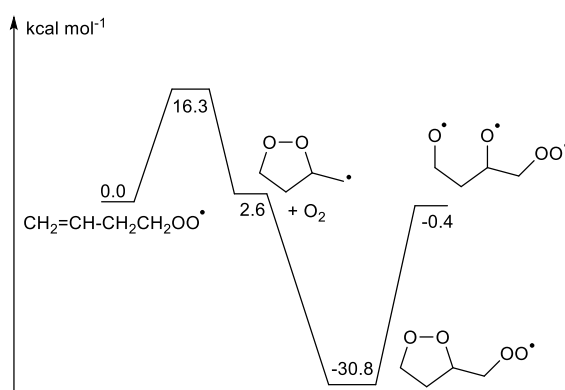

Figure S6.2.

Hence, the O<sub>2</sub> addition energy release is barely enough to break the weakest bond, making bond fission in the c-QO<sub>2</sub> negligible against thermalization. Additionally, Vereecken et al.<sup>7</sup> showed that the c-QO<sub>2</sub> radical as shown

## SUPPORTING INFORMATION

above does not have fast H-migration reactions, the fastest channel being a 1,6-H-migration across the 5-membered ring with  $k(298\text{ K}) = 1 \times 10^{-2} \text{ s}^{-1}$ . Hence, further autoxidation of the c-QO<sub>2</sub> does not seem to provide an accessible pathway to high yields of acrolein formation.

We also examined the fate of the c-QO alkoxy radical, formed from c-QO<sub>2</sub> after reaction with NO or RO<sub>2</sub>, as a potential source of acrolein. The steps are shown in Scheme S6.3 for the c-QO<sub>2</sub> formed from 2-Me-2-pentenyl-O<sub>2</sub>.

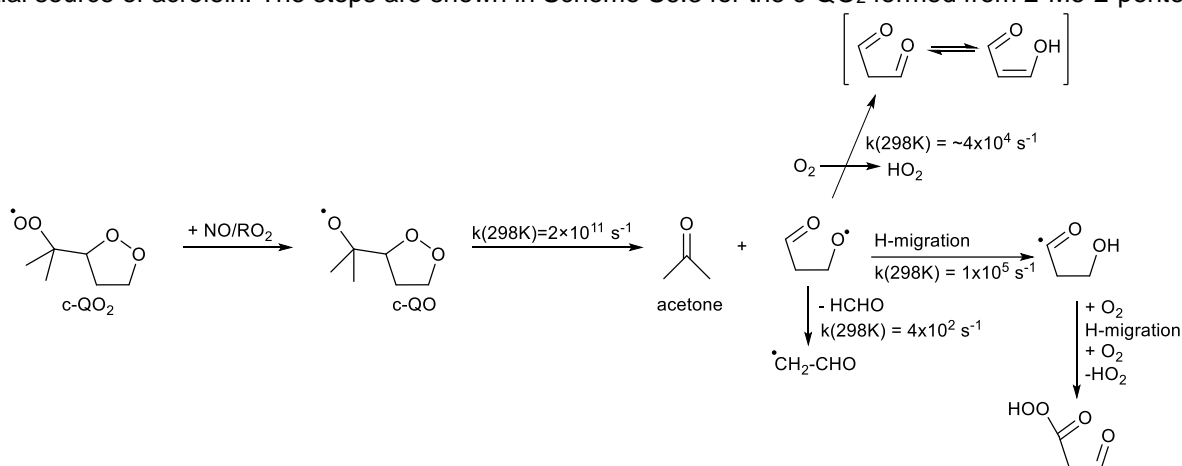

Scheme S6.3

Decomposition of such a c-QO is indeed expected to readily form the observed acetone, with a rate  $\geq 10^{11} \text{ s}^{-1}$ .<sup>9, 10</sup> The cycloperoxide fragment has an  $\alpha$ -OOR alkyl radical site, which are known to be unstable and readily breaks the O–O bond, forming a carbonyl group and an alkoxy radical.<sup>11</sup> The alkoxy radical can undergo an aldehydic 1,4-H-migration ( $k(298\text{ K}) = 1 \times 10^5 \text{ s}^{-1}$ ), elimination of CH<sub>2</sub>O ( $k(298\text{ K}) = 4.1 \times 10^2 \text{ s}^{-19}$ ), or reaction with O<sub>2</sub> ( $k(298\text{ K}) \sim 4 \times 10^4 \text{ s}^{-1}$  for 0.2 atm O<sub>2</sub>) forming O=CHCH<sub>2</sub>CH=O. None of these products show a facile route to acrolein or any of its isomers, even if we account for a potentially high internal energy content. It is unclear at this time how the predicted products respond to ionization by H<sup>+</sup>/H<sup>+</sup>(H<sub>2</sub>O)<sub>n</sub>.

At this point we should mention that the proposed mechanisms have some pathways leading to acrolein formation through well-known channels in peroxy and alkoxy chemistry, such as the decomposition sequence shown in Scheme S6.4 starting at 1-hexenyl-O<sub>2</sub>.

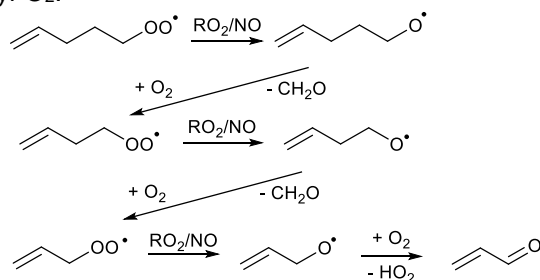

Scheme S6.4.

While this sequence has some viability starting at 1-butenyl-O<sub>2</sub>, where CH<sub>2</sub>O elimination is the fastest channel, the chemistry of unsaturated alkoxy radicals with longer carbon chains are dominated by allylic H-migration and ring closure reactions, none of which seem to lead to acrolein formation. As acrolein is observed for all unsaturated RO<sub>2</sub> reacting through ring closure, traditional RO<sub>2</sub>+RO<sub>2</sub>/HO<sub>2</sub>/NO chemistry as shown above is not tenable as the main acrolein-forming mechanism for all RO<sub>2</sub> studied here. Additionally, our modeling shows that the self- and cross-reactions of the RO<sub>2</sub> only contribute for a small fraction.

### Formation of unsaturated cyclo-ethers, carbonyls, alcohols, or epoxides

For all the RO<sub>2</sub> radicals studied in this work, the mass spectra displayed an ion peak corresponding to a stable product with a  $m/z$  at 17 mass units below that of the RO<sub>2</sub>, along with the corresponding water/proton clusters in the CIMS:  $m/z$  71/89 for butenyl-O<sub>2</sub>,  $m/z$  85/103 for 1-pentenyl-O<sub>2</sub>, and  $m/z$  99/117 both for hexenyl-O<sub>2</sub>, and 2-

## SUPPORTING INFORMATION

methyl-2-pentenyl-O<sub>2</sub>. These masses correspond to the main carbonyl compounds expected from the self-reactions of the RO<sub>2</sub> but also to other isomers. For instance, for 1-pentenyl-O<sub>2</sub>, they correspond to compounds with the sum formula C<sub>5</sub>H<sub>8</sub>O such as in Fig. S6.5.

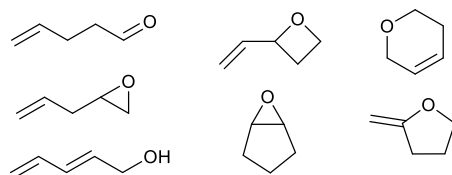

Figure S6.5.

However, these signals were much more intense in the 1-pentenyl-O<sub>2</sub> and 1-hexenyl-O<sub>2</sub> systems than in the butenyl-O<sub>2</sub> and 2-methyl-2-pentenyl-O<sub>2</sub> systems (9000 – 80000 cps vs 4000 – 6500 cps), suggesting that they resulted from other isomers than the linear carbonyl compounds expected from the RO<sub>2</sub> self-reactions (see discussion below). Furthermore, for 1-pentenyl-O<sub>2</sub> and 1-hexenyl-O<sub>2</sub>, which react near-exclusively by allylic H-migration, intense peaks were observed at *m/z* that could potentially be attributed to dehydrated ions resulting from some of the cyclic isomers presented in Schemes S6.14 and S6.16: *m/z* 67, 6500 cps for 1-pentenyl-O<sub>2</sub>, and *m/z* 81, 25000 cps for 1-hexenyl-O<sub>2</sub>. These products were not present with butenyl-O<sub>2</sub> and 2-methyl-2-pentenyl-O<sub>2</sub>, which react mostly by cyclisation, thus were attributed to the product channels related to the allylic H-migration. Assuming also a typical detection sensitivity of 30000 cps/ppb for these products, the observed intensities corresponded to ~ 1 ppb with 1-pentenyl-O<sub>2</sub> (60000 cps in average) thus a 66 % yield and 1.2 ppb with 1-hexenyl-O<sub>2</sub> (~ 35000 cps) and a ~ 55 % yield. Below, we discuss some possible mechanisms for the formation of products of this mass, illustrating the pathways using 1-pentenyl-O<sub>2</sub>.

#### Mechanism A: carbonyl channel in primary RO<sub>2</sub>+RO<sub>2</sub>

As explained above, possible candidates for the intense ions at *m/z* 85/103 for 1-pentenyl-O<sub>2</sub> and *m/z* 99/117 for 1-hexenyl-O<sub>2</sub> are the carbonyl products formed from their self-reactions, as illustrated in Scheme S6.6.

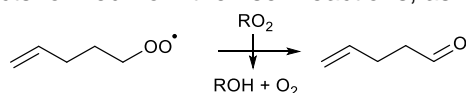

Scheme S6.6.

However, for the bimolecular RO<sub>2</sub>+RO<sub>2</sub> reactions our modeling suggests that the pseudo-first order loss rate for these RO<sub>2</sub> by self-reaction would be ~ 0.17 s<sup>-1</sup> for 1-pentenyl-O<sub>2</sub> and 0.18 s<sup>-1</sup> for 1-hexenyl-O<sub>2</sub> (albeit with large uncertainties on the RO<sub>2</sub> concentrations indicated in Table S1). This represented only ~ 45 - 60 % of the measured overall losses for these radicals (~ 0.3 s<sup>-1</sup>), the latter being largely attributed to their unimolecular processes. Assuming a similar sensitivity for the primary RO<sub>2</sub> and the unknown product, it would require an increase of a factor 1.5 – 2.5 of the rate of primary RO<sub>2</sub>+RO<sub>2</sub> compared to the recommendation by Jenkin et al.<sup>4</sup> to account for the observed RO<sub>2</sub> decays but factors 4.5 – 7.5 to allow sufficient alkenone formation. In addition, these carbonyl products would not explain the observation of the intense ions corresponding to the “dehydrated” cyclic ethers.

#### Mechanism B: cycloether+OH formation from HOOQ

Other potential products accounting for the observed intense ions might be the direct formation of a cyclic ether with OH elimination from the HOOQ intermediate, as illustrated for the 1-pentenyl-O<sub>2</sub> system in Scheme S6.7.

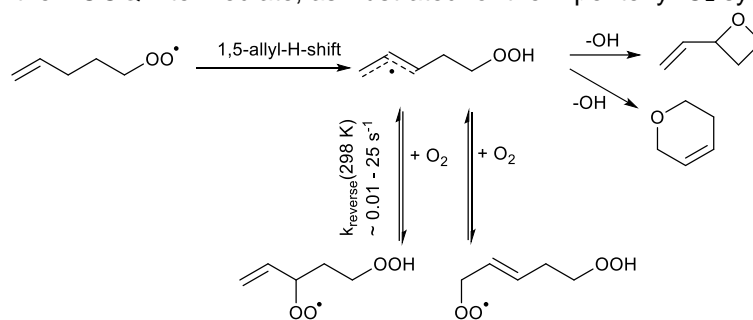

Scheme S6.7.

## SUPPORTING INFORMATION

This process is well-known in combustion for hydroperoxy-substituted alkyl radicals,<sup>12-14</sup> with barrier as low as 10 kcal mol<sup>-1</sup>. To our knowledge, no literature data exists on the rate of (non-epoxide) cyclic ether + OH formation for allylic radicals. Our theoretical calculations predict barriers in excess of 25 kcal mol<sup>-1</sup> for the 5-OOH-2-butenyl allylic radical, with rate coefficients of  $k(298\text{ K}) \leq 10^{-6}\text{ s}^{-1}$  (see Table S7.2), in agreement with the low rates for epoxide formation predicted by Møller et al.<sup>15</sup> This ring closure occurs in competition with the reversible O<sub>2</sub> addition on the allylic radical site, and through that with the loss processes of the HOOQO<sub>2</sub> radicals (see Scheme S6.7). All these competing processes occur with rates several orders of magnitude faster than the cyclic ether + OH channel, making the latter likely a negligible channel (see Novelli et al.<sup>16</sup> for estimated rates for O<sub>2</sub> addition and re-elimination from allylic RO<sub>2</sub> radicals).

**Mechanism C: cyclisation of primary alkoxy radicals, followed by HO<sub>2</sub> elimination**

Other potential pathways for the formation of cyclic ethers could be the cyclisation of (neutral) alkoxy radicals followed by HO<sub>2</sub> formation, either concertedly or in an H-shift/elimination sequence as illustrated for the 1-pentenyl-O<sub>2</sub> system in Scheme S6.8:

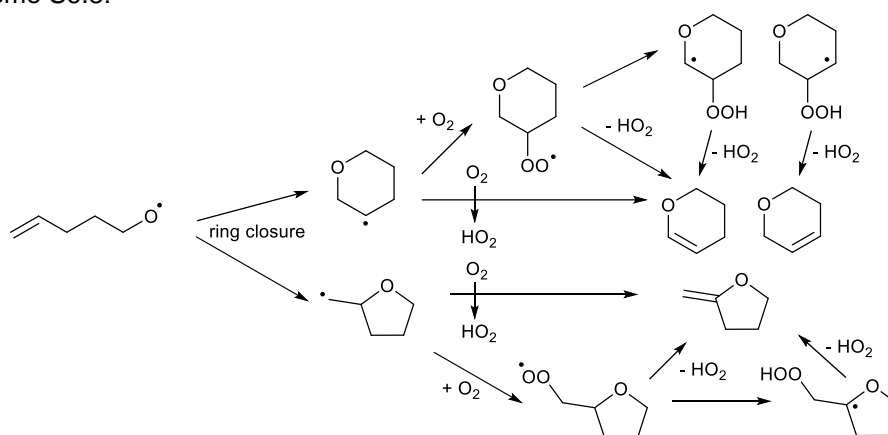

**Scheme S6.8.**

The alkoxy radical is the main product from the primary RO<sub>2</sub> in its reactions with RO<sub>2</sub> or NO. The potential energy surface of this reaction system has been calculated theoretically:

## SUPPORTING INFORMATION

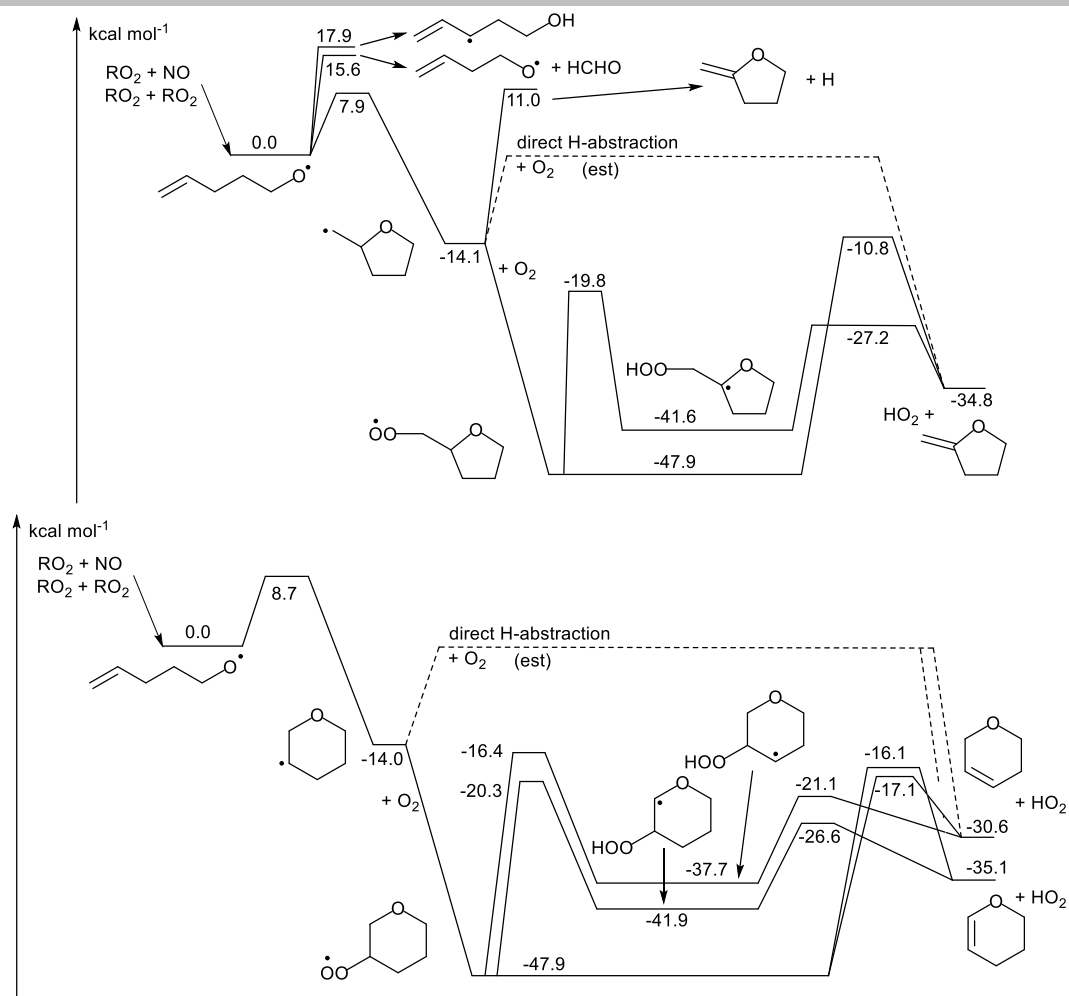

Figure S6.9:

For regular alkyl radicals, O<sub>2</sub> addition is not sufficiently exothermic to allow sizable amounts of HO<sub>2</sub> + alkene formation at atmospheric temperature. Though it is often overwhelmed by more facile RO<sub>2</sub> H-migration reactions, HO<sub>2</sub> + alkene formation is, however, a pathway that is known to occur at combustion temperatures (see e.g. Ref.<sup>17</sup>), indicating that additional internal energy enhances its relative importance. Its main formation pathway is an addition/H-migration/HO<sub>2</sub>-elimination mechanism, as direct H-abstraction by O<sub>2</sub> has a high barrier (see e.g. Ref.<sup>18</sup>), while concerted HO<sub>2</sub> elimination is calculated here to have slightly higher barriers. For the cycloether peroxy radicals studied here, competing H-migrations are less favorable due to the ring structure.<sup>7</sup> Table S7.2 shows rate coefficients for the thermal elementary reactions in the mechanisms, indicating that the reactions are too slow to compete with regular loss processes. However, the cyclo-ether alkyl radical is chemically activated from the alkoxy ring closure reaction, and the alkoxy radical itself may already be formed with an enhanced energy content from the RO<sub>2</sub> + RO<sub>2</sub> or RO<sub>2</sub> + NO formation reaction. If this increased internal energy is (partly) carried over to the cyclo-RO<sub>2</sub>, this could enhance the formation of cyclic unsaturated ethers + HO<sub>2</sub> to measurable levels. Even for thermal alkoxy radicals, the ring closure reaction is the dominant loss process (see Table S7.2), dominating other unimolecular reactions and reaction with O<sub>2</sub> ( $k \sim 4 \times 10^4 \text{ s}^{-1}$  at 0.2 atm O<sub>2</sub>).<sup>19</sup> The PES shown above are not complete, as they don't include potential competing reactions from other RO<sub>2</sub> H-migrations, or epoxy+OH formation; a full Master Equation analysis quantifying the effect of chemical activation is not in the scope of the present work. A critical parameter will be the rate of O<sub>2</sub> addition, which is not overly fast ( $\sim 10^7 \text{ s}^{-1}$  at 0.2 atm O<sub>2</sub>), leaving time for collisional energy loss in the cycloether-peroxy intermediate. It should also be noted that, for the unsaturated RO<sub>2</sub> studied in this work, this mechanism is most viable for 1-pentenyl-O<sub>2</sub> (see the discussion of the annotated mechanism for 1-pentenyl-O<sub>2</sub> below for some corroborating evidence). This process would form isomers of the P10 product, where the formation of cyclic ethers was strongly supported experimentally by the observation of intense ions in the 1-pentenyl-O<sub>2</sub> and 1-hexenyl-O<sub>2</sub> systems, corresponding to dehydrated ions from these ethers. For 1-butenyl-O<sub>2</sub>, the alkoxy ring closure yields a strained 4-membered ring and is energetically unfavorable; for 1-hexenyl-O<sub>2</sub> the alkoxy ring closure forming 6 and 7-membered rings is entropically less favorable and is likely

## SUPPORTING INFORMATION

outperformed by the fast allylic 1,5-H-migration (see section S6); for 2-Me-2-pentenyl-O<sub>2</sub>, the ring closure in the primary RO<sub>2</sub> is very fast such that only a negligible fraction of the primary RO<sub>2</sub> can react with RO<sub>2</sub>/NO.

**Mechanism D: cyclisation of hydroperoxyalkoxy radical HOOQO, followed by HO<sub>2</sub> elimination**

Cyclic ether formation by ring closure in alkoxy radicals formed from RO<sub>2</sub> + RO<sub>2</sub> or RO<sub>2</sub> + NO reactions can also occur for some of the HOOQO<sub>2</sub> intermediates; as an example we show the following simplified potential energy surface for one of the HOOQO<sub>2</sub> intermediates from 1-pentenyl-O<sub>2</sub>:

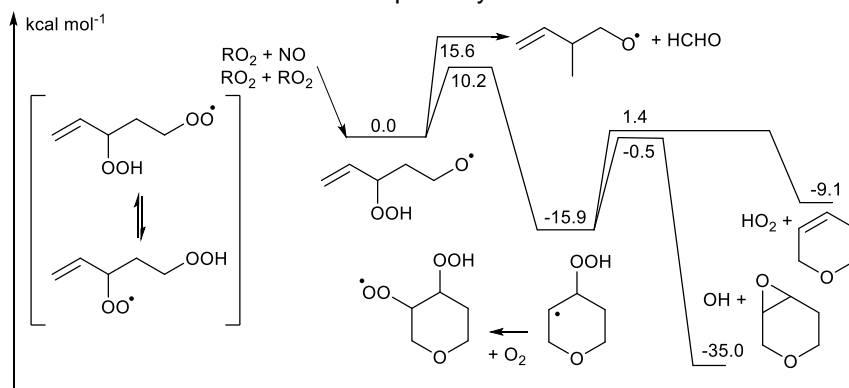

Figure S6.10:

The alkoxy ring closure reaction directly forms a  $\beta$ -OOH cycloalkyl radical that can undergo HO<sub>2</sub> elimination to form an unsaturated cyclo-ether with the searched-for mass. The main competition channel for HO<sub>2</sub> elimination is epoxide formation, which for thermalized linear  $\beta$ -OOH alkyl radicals with alkyl substituents was theoretically calculated by Møller et al.<sup>15</sup> to be 6 times faster than HO<sub>2</sub> elimination, with both of these channels several orders of magnitude slower than O<sub>2</sub> addition. For the present case, we must however consider the impact of the ring structure, the enhanced energy content imparted by the alkoxy ring closure, and the difference in entropy for the two loss processes. For thermal reaction we find that epoxidation is the fastest reaction channel, in agreement with Møller et al.<sup>15</sup> HO<sub>2</sub> elimination, however, is entropically more favorable, and gains in importance at higher temperatures or internal energies, such that cyclic-ether formation will gain in importance at the energies afforded by the exothermic ring closure; a full Master Equation analysis quantifying the effect of chemical activation is not in the scope of the present work.

The alkoxy ring closure reaction starting the reaction chain shown above faces competition from other unimolecular reaction channels (not shown), such as the formation of a 5-membered cycloether, fast H-migration reactions, and (slower) decomposition reactions. The reaction systems studied in this work have a multitude of unsaturated hydroperoxide-alkenylperoxy radicals that could undergo analogous complex alkoxy radical chemistry after reaction with RO<sub>2</sub> or NO. Hence, quantifying the yield of the hydroperoxide-cycloalkyl structure depicted above, or the yield of cycloethers in general is a complex undertaking and is outside the scope of the present study.

**Mechanism E: unknown subsequent chemistry of (HOO)<sub>2</sub>QO<sub>2</sub>**

We should consider that a product may be formed from the intermediates formed from the HOOQO<sub>2</sub> intermediate. These latter radicals are predicted to undergo mostly ring closure reactions with, depending on the addition site of the O<sub>2</sub>, a rate of 0.16 or 48 s<sup>-1</sup> for the 1-pentenyl-O<sub>2</sub> system. The most likely candidate for further autoxidation is the HOOQO<sub>2</sub> intermediate formed after O<sub>2</sub> addition on the inner C-atom of the HOOQ radicals, as illustrated in scheme S6.11:

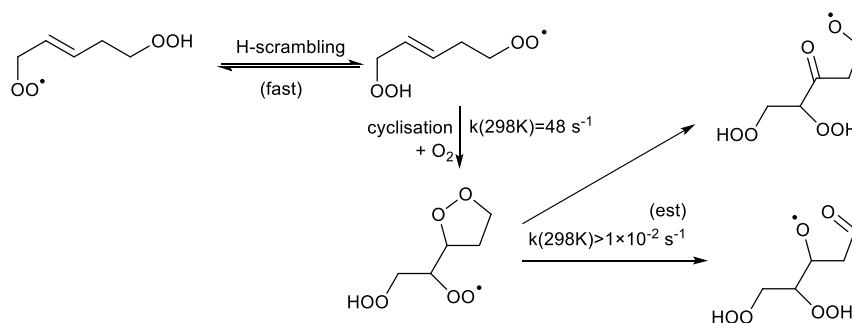

Scheme S6.11.



## SUPPORTING INFORMATION

The subsequent chemistry of the resulting  $(\text{HOO})_2\text{QO}_2$  radicals is very complex with a highly branched mechanism, and theoretical calculations are expensive due to the large number of oxygen atoms. As such, it is unclear whether the target products could be formed. Similarly, we can't exclude that alkoxy radical intermediates formed from the reaction of  $\text{RO}_2$ ,  $\text{HOOQO}_2$ , or  $(\text{HOO})_2\text{QO}_2$  intermediates with other  $\text{RO}_2$  radicals could lead ultimately to products of the required mass; again, this chemistry is highly complex and no prominent direct pathway to such a product is obvious. A full analysis of this continued chemistry is outside the scope of this work. Still, one should consider that oxygen atoms, once attached to the backbone, are hard to remove again in subsequent reactions, such that forming a product with a stoichiometry of  $\text{C}_5\text{H}_8\text{O}$  for the 1-pentenyl- $\text{O}_2$  system, and analogously low-oxygenated products for the other systems, seems unlikely from the higher-oxygenated intermediates.

### Mechanism F: Chemistry induced by protonation in the ionization chamber

The chemical ionization used in this work, based on  $(\text{H}_2\text{O})_n\text{H}^+$  clusters, is particularly soft and tends not to lead to fragmentation. At the same time, the unsaturated oxygenated radicals studied here may allow for chemistry that is not accessible in saturated species, and that may be enhanced in kationic form.

To probe the possibility of ionization-induced chemistry, we examined the fate of the allylic HOOQ intermediates similar to mechanism B, but upon addition of an  $\text{H}^+$  atom, probing reactions that might occur in the ionization cell based on  $(\text{H}_2\text{O})_n\text{H}^+$  clusters. Our preliminary calculations indicate that the proton adds to the  $-\text{OOH}$  moiety, rearranging without energy barrier to a  $\text{H}_2\text{O}$  moiety and forming a  $[\text{CH}_2=\text{CH}-\text{C}^+\text{H}-\text{CH}_2-\text{CH}_2\text{O}^+]$  allyl-alkoxy biradical cation complexed with the  $\text{H}_2\text{O}$ . This radical readily cyclizes, forming the [cyclic ether +  $\text{H}_2\text{O}$ ] $^+$  complex with a low barrier of about  $6 \text{ kcal mol}^{-1}$  (see Scheme S6.12 top) These calculations are likely not a very good representation for the impact of  $(\text{H}_2\text{O})_n\text{H}^+$  clusters on the HOOQ intermediates, and the chemistry is expected to be significantly more complex. Still, they do suggest that the ionization could facilitate formation of the cyclic ether products in the ionization chamber. Overall, though, it seems unlikely that chemistry of the HOOQ in the ionization chamber is the main source of the prominent peak, as the HOOQ are lost by  $\text{O}_2$  addition, H-scrambling and cyclization reactions with effective rates  $\geq 1 \text{ s}^{-1}$ , such that the concentration of free HOOQ radical reaching the ionization chamber is likely not very high.

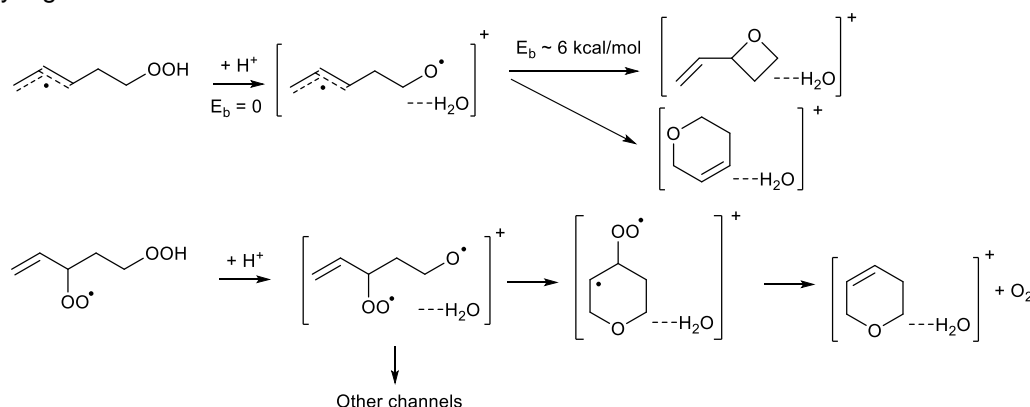

**Scheme S6.12.**

Another conceivable mechanism for  $\text{C}_5\text{H}_8\text{O}$  cyclic ether formation would be upon protonation of a  $\text{HOOQO}_2$ , which we illustrate here by a re-arrangement similar to mechanism D (see Scheme S6.12 bottom). This would lead to a  $\beta\text{-OO}^{\bullet}$  alkyl radical, which would readily eliminate  $\text{O}_2$  to form the double bond. We have not performed theoretical calculations on this mechanism, but assume the barriers are as low as for protonated mechanism B discussed above.

If the  $\text{H}^+$ -induced fragmentation of  $-\text{OOH}$  groups to an alkoxy group and  $\text{H}_2\text{O}$  is occurring more generally, the systems studied here have a potential of creating measurement artefacts owing to ion chemistry driven by the alkoxy chemistry formed from any  $-\text{OOH}$  group. As alkoxy chemistry is generally much faster than  $\text{RO}_2$  chemistry, this could lead to high apparent yields of the products. As long as the products do not dissociate, however, the mass of the ion cluster remains the same, and would be indistinguishable from the original product. This makes assessing the importance of kationic chemistry very hard.

### Formation of alkyhydroperoxides, $\text{CH}_3\text{OOH}$ and $\text{C}_2\text{H}_5\text{OOH}$

## SUPPORTING INFORMATION

The formation of small C1 and C2 compounds can have many sources in experiments such as described in this paper. Still, the experiments on 1-butenyl-O<sub>2</sub> and 1-propenyl-O<sub>2</sub> show masses equivalent to CH<sub>3</sub>OOH and CH<sub>3</sub>CH<sub>2</sub>OOH, respectively, so in the interest of completeness it is worth to briefly examine potential formation pathways. Neither of the initiating compounds start out with a methyl group. Formation of a methyl group by H-migration to a R-C<sup>\*</sup>H<sub>2</sub> radical would have to compete against addition of O<sub>2</sub> ( $k \sim 5 \times 10^7 \text{ s}^{-1}$ ), while aliphatic H-migration have theoretical and experimental rate coefficients  $\leq 10^4 \text{ s}^{-1}$  at room temperature (e.g. Davis et al.<sup>20, 21</sup>). Even accounting for more mobile H-atoms (e.g. aldehydic, allylic or hydroperoxidic H-atoms), formation of competitive yields of methyl groups seems unlikely through such an H-migration pathway. We can't exclude that H-migration is more facile in the ionization chamber, where complexes with (H<sub>2</sub>O)<sub>n</sub>-H<sub>3</sub>O<sup>+</sup> may have access to mobile protons, but earlier experiments on saturated RO<sub>2</sub><sup>22</sup> have not shown this to be an important channel.

The diols HOCH<sub>2</sub>OH and HOCH<sub>2</sub>CH<sub>2</sub>OH are alternative isomers to the alkylhydroperoxides discussed above that do not require the formation of a methyl moiety. Diols are known to be formed from hydration of aldehydes [e.g; Winkelman et al.<sup>23</sup>], and are even the dominant forms in aqueous solutions of aldehydes. However, the gas phase oxidation schemes do not provide any viable pathways to (gemini-)diols and, while water is present in the ionization chamber, the experimental setup is not known to show a clear peak for the equivalent diol when measuring aldehydes.

Finally, we surmise that the alkylhydroperoxides are co-products of acrolein, which we assigned to a hitherto unknown decomposition channel of the cycloperoxide alkylperoxy radicals formed from cyclisation of unsaturated RO<sub>2</sub> (see section S6). We currently have no proposal how this re-arrangement/dissociation would take place.

As no obvious routes to either C1/C2 alkylhydroperoxides or diols were identified, the chemical speciation and the formation pathways of the molecules generating these mass peaks remains unclear at this time.

## SUPPORTING INFORMATION

1-butenyl-O<sub>2</sub> annotated mechanism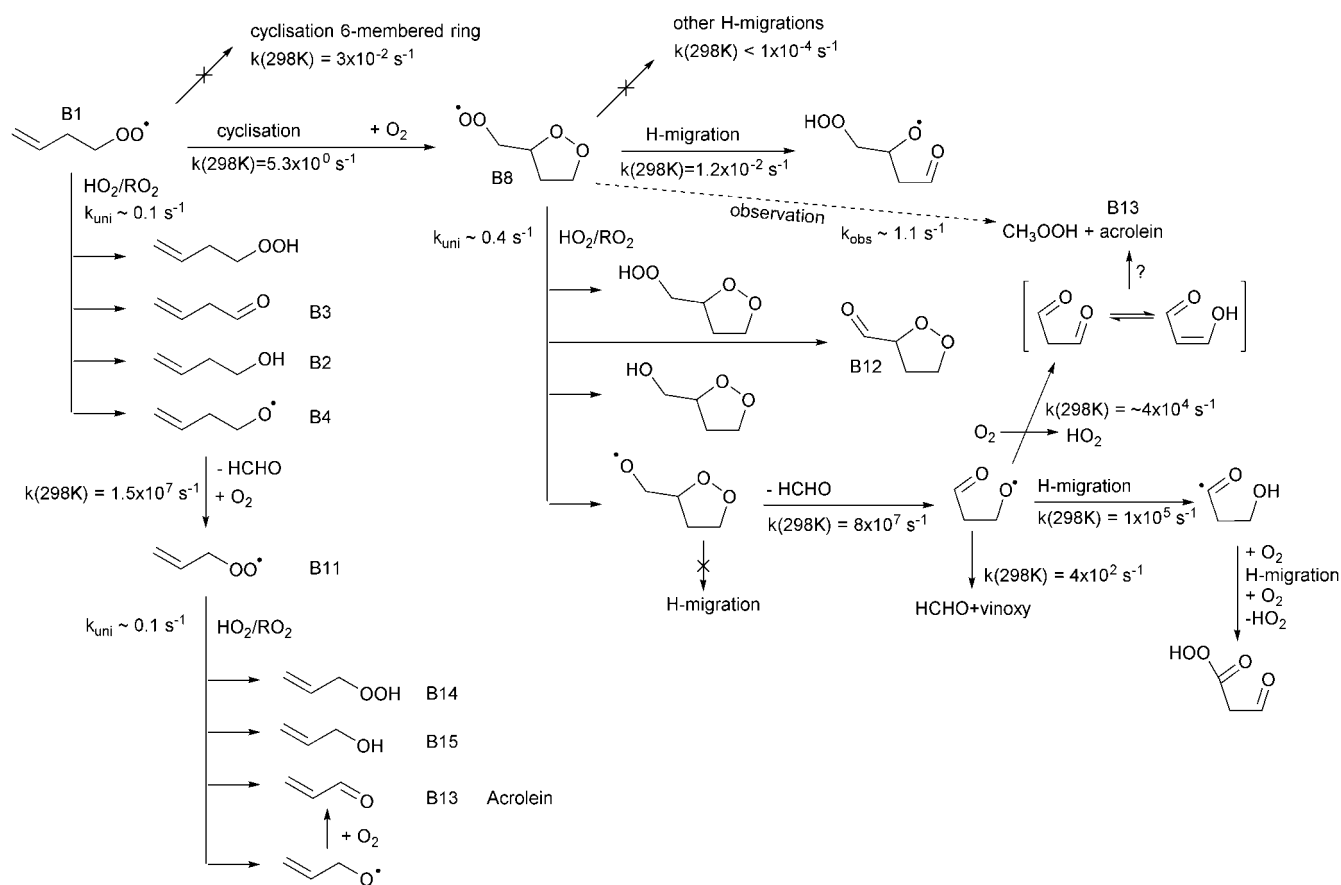

**Figure S6.13:** Extended mechanism for the oxidation of 1-butenyl-O<sub>2</sub> radicals

The rate coefficients for unimolecular reactions of 1-butenyl-O<sub>2</sub> radicals (B1) were calculated in this work (see Table S7.1), where the dominant route is cyclisation to a 5-membered peroxide ring (alkyl radical B5). Model calculations estimate the bimolecular loss by reactions with HO<sub>2</sub>/RO<sub>2</sub> at a pseudo-first order rate coefficient of about 0.1 s<sup>-1</sup>. These latter reactions lead to directly to some observed products and can lead to an alkoxy radical B4. SAR<sup>9</sup> predict that formaldehyde elimination is the dominant fate of this radical, forming an allyl-peroxy radical that has no viable unimolecular loss processes and thus reacts with HO<sub>2</sub>/RO<sub>2</sub> to form a number of stable products, or an alkoxy radical that will react with O<sub>2</sub> to form acrolein. Acrolein formation through this sequence of reactions is slow due to the need of two reactions with RO<sub>2</sub>, and is unlikely to have a high yield due to the competing formation of alcohols, ketones, hydroperoxides, and the cyclisation route in B1.

The cycloperoxide alkyl product formed from B1 will add O<sub>2</sub>,<sup>7</sup> forming peroxy radical B8. The study by Vereecken et al.<sup>7</sup> showed no fast unimolecular loss processes for B8, while reactions with RO<sub>2</sub> and HO<sub>2</sub> are modelled to contribute a loss of ~0.43 s<sup>-1</sup>, which is also the dominant loss in the theoretically predicted and modelled loss processes. The observed time evolution for B8, requires an additional loss process of ~0.9 s<sup>-1</sup>. The expected chemistry does not show formation pathways to acrolein in yields that are sufficient to explain the peak heights observed in the mass spectra. We refer to the discussion in section S6 regarding acrolein formation.

## SUPPORTING INFORMATION

1-pentenyl-O<sub>2</sub> annotated mechanism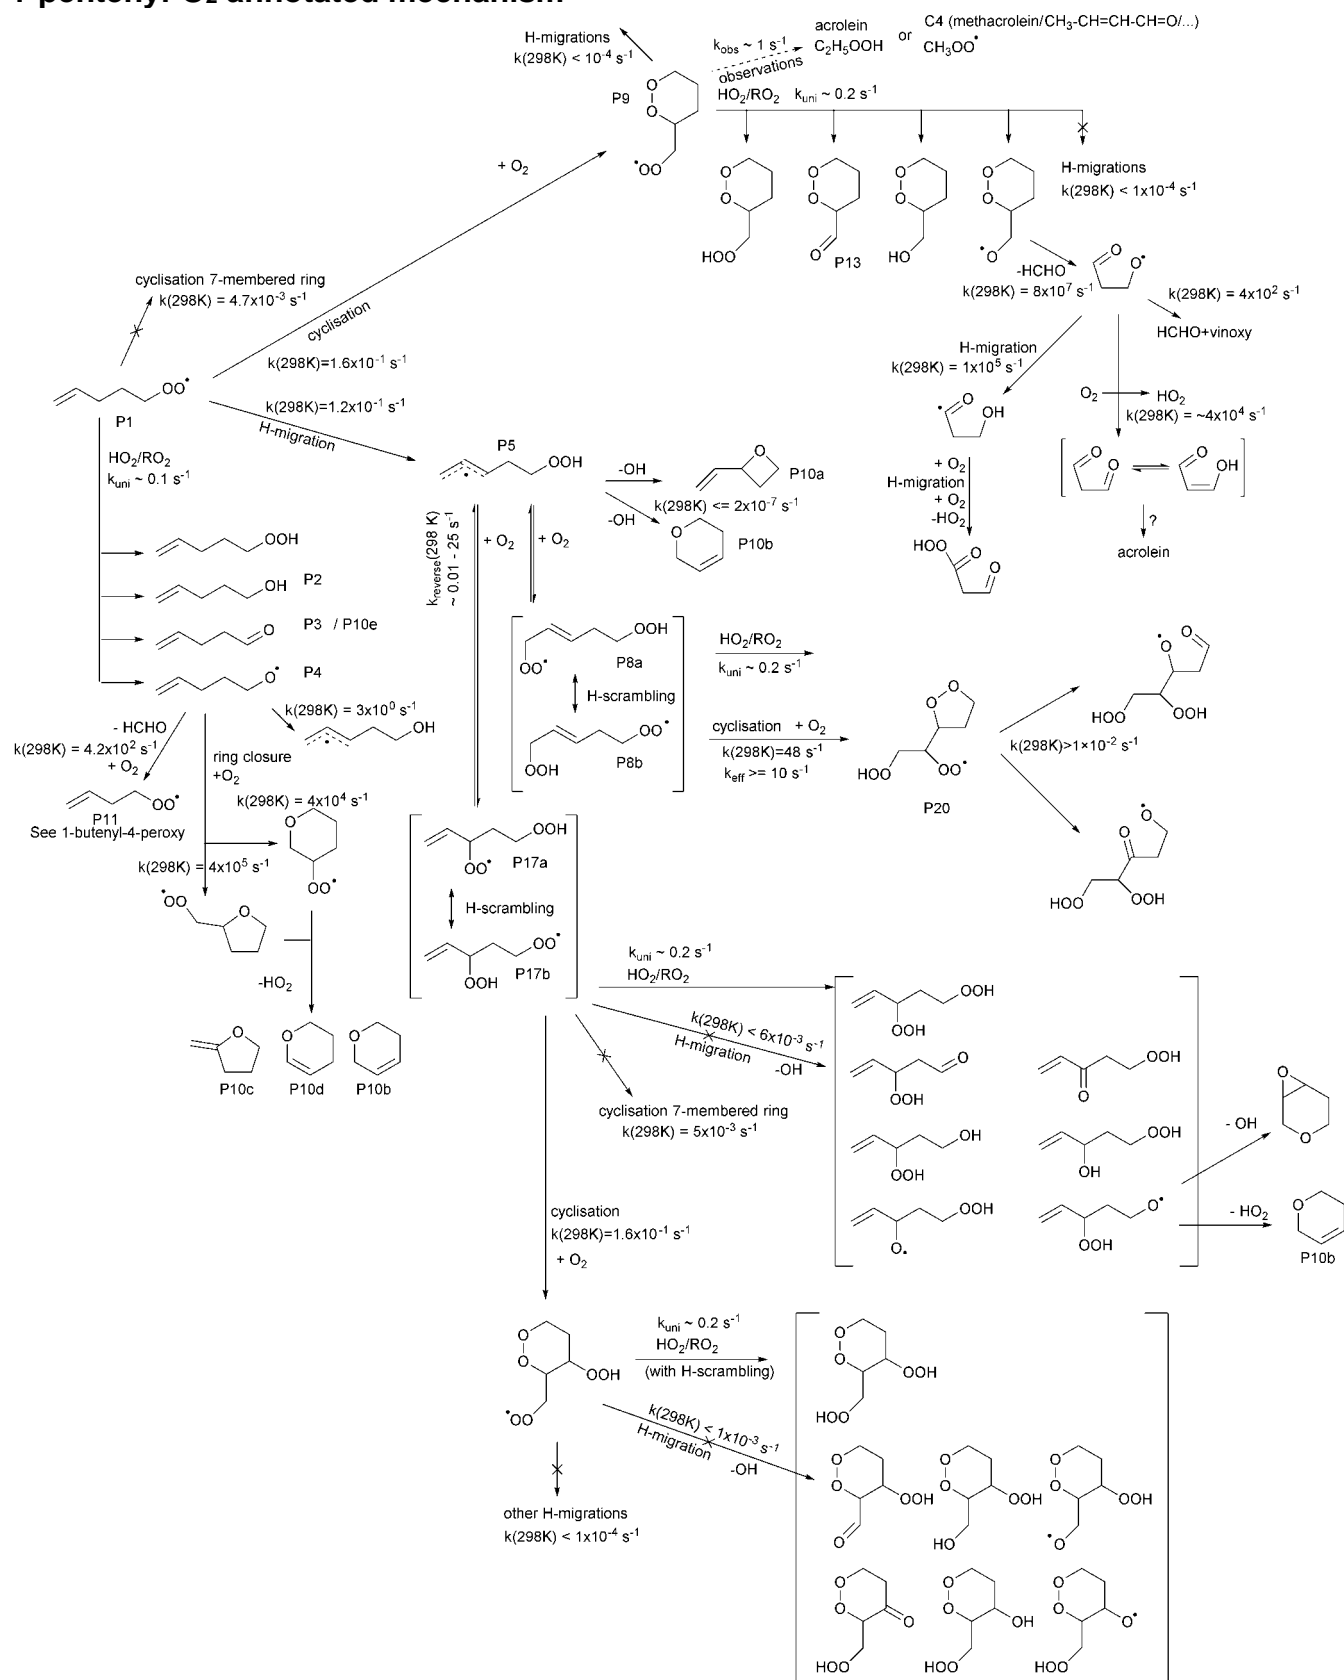Figure S6.14: Extended mechanism for the oxidation of 1-pentenyl-O<sub>2</sub> radicals

## SUPPORTING INFORMATION

The rate coefficients for unimolecular reactions of 1-pentenyl-O<sub>2</sub> radicals (P1) were calculated in this work (see Table S7.1), where two main routes are accessible with similar contribution: ring closure forming a 6-membered ring ( $k \sim 1.6 \times 10^{-1} \text{ s}^{-1}$ ), and allylic 1,5-H-migration ( $k \sim 1.2 \times 10^{-1} \text{ s}^{-1}$ ).

The cycloperoxide alkyl product formed from P1 will add O<sub>2</sub>, (see Vereecken et al.<sup>7</sup>), forming peroxy radical P9. The study by Vereecken et al.<sup>7</sup> showed no fast unimolecular loss processes for P9, while reactions with RO<sub>2</sub> and HO<sub>2</sub> are modelled to contribute a loss of  $\sim 0.2 \text{ s}^{-1}$ , which is also the dominant loss in the theoretically predicted and modelled loss processes. The observed time evolution for P9, however, cannot be reproduced unless a total loss process of  $\sim 1 \text{ s}^{-1}$  is included in the mechanism. The expected chemistry also does not show formation pathways to acrolein and C<sub>2</sub>H<sub>3</sub>OOH in yields that are sufficient to explain the peak heights observed in the mass spectra, nor to formation of CH<sub>3</sub>O<sub>2</sub> and a C<sub>4</sub>H<sub>6</sub>O compound tentatively assigned to a methacrolein (CH<sub>2</sub>=C(CH<sub>3</sub>)-CH=O) or isomers (e.g. CH<sub>3</sub>-CH=CH-CHO, CH<sub>2</sub>=CH-C(=O)-CH<sub>3</sub>, or CH<sub>2</sub>=CH-CH<sub>2</sub>-CH=O). We refer to the discussion in section S6 regarding fragmentation of the c-QO<sub>2</sub> P9 intermediate as a source of these hydroperoxides and unsaturated aldehydes.

The allyl-1,5-H-migration leads to the resonance-stabilized P5 hydroperoxide-allyl radical. For such resonance-stabilized radicals it is known that O<sub>2</sub> addition is slower than for alkyl radicals, and reversible.<sup>16, 24</sup> The O<sub>2</sub> adducts P8 and P17 are therefore re-equilibrating continuously. The rate at which this happens is unknown, but for isoprene-derived hydroxy-allyl-radicals it was determined that this happens at an order of magnitude of  $1 \text{ s}^{-1}$  for isomers where the H-bonding group is not adjacent to the added OO (where we assume OH and OOH have a similar impact).<sup>16, 24</sup> A second effect playing is that the H-atom of the -OOH group is readily exchanged with the -OO• radical group, where this so-called H-scrambling occurs at rates of the order of  $10^2 \text{ s}^{-1}$ .<sup>5</sup> The net result of these interconversions is that isomers P8a, P8b, P17a and P17b (and allyl radical P5 in much lower concentrations) are re-equilibrating at a timescale of about 1 s. As discussed extensively by Vereecken and Nozière<sup>5</sup>, this pool of RO<sub>2</sub> radicals then typically disappears through the fastest loss channel accessible to all isomers. In this case this is the cyclisation reactions of P8b to a cyclic peroxide P20, where the elementary reaction is predicted by the theoretical work of Vereecken et al.<sup>7</sup> to occur at a rate close to  $50 \text{ s}^{-1}$ . Accounting for the pooling across the four RO<sub>2</sub> intermediates, this would lead of an effective loss rate of  $\sim 12 \text{ s}^{-1}$  if the RO<sub>2</sub> were re-equilibrated instantly, but is probably closer to  $k \sim 1\text{-}5 \text{ s}^{-1}$  overall when accounting for the somewhat slower re-equilibration by O<sub>2</sub>-elimination-readdition via allyl radical P5. The slower isomerization through P5 also allows cyclisation in P17b to have a minor contribution (elementary reaction rate  $\sim 1.6 \text{ s}^{-1}$ , Vereecken et al.<sup>7</sup>) for that fraction of P5 where the initial O<sub>2</sub> addition leads to P17. The effective lifetime in the order of a second estimated thus is in agreement with the experimental observation, where little to no P12/P14 isomers were observed.

The observations also found intense signals at masses corresponding to C<sub>5</sub>H<sub>8</sub>O-H<sup>+</sup> and C<sub>5</sub>H<sub>8</sub>O-H<sub>3</sub>O<sup>+</sup> clusters. Possible formation pathways are discussed in detail in section S6, and some of these are shown in scheme S6.14 shown above. Though this analysis is highly tentative at best, we attempted to probe some pathways. Observing the evolution of some ion signals as NO (> 10 ppm) is periodically added into the sampling line of the CIMS (Figure S6.15) can help in this analysis. As explained in the Experimental Section, excess NO is added periodically in the sampling line (0.2 s of residence time, Pressure  $\sim 0.1 \text{ atm}$ ) to distinguish the signals from RO<sub>2</sub> radicals from those of other compounds. The signals systematically decreasing when NO is added are thus those of peroxy radicals while those increasing are those of their reaction products with NO formed in the sampling line (i.e. produced in addition to the stable products formed in the reactor). The RO<sub>2</sub> P1 and CH<sub>3</sub>O<sub>2</sub> were the only peroxy radicals found to be produced in the 1-pentenyl-O<sub>2</sub> system. Fig. S6.15 shows that the signals for these radicals indeed decrease when NO is added, while the signal at  $m/z$  85 (C<sub>5</sub>H<sub>8</sub>O-H<sup>+</sup>) is not affected by NO and a small fraction of the signal at  $m/z$  103 increases systematically. The fraction of the signal at  $m/z$  103 that increases with NO corresponds to the main product of the reaction of the peroxy radical P1 with NO and, more specifically, of the alkoxy radical P4. As explained in Section S6, in Mechanism C (cyclisation of unsaturated alkoxy radical followed by O<sub>2</sub> addition and HO<sub>2</sub> elimination) the 5-membered P10c isomer is expected to be the main product of the alkoxy radical P4. Rate coefficients were calculated theoretically (Table S7.2) for H-migration and ring closure in this pathway, while HCHO elimination was estimated from the SAR by Vereecken and Peeters.<sup>9</sup> Other isomers of P10 can, however, be produced by other pathways, such as from the linear alkyl radical P5 (cf. Scheme S10). The fraction of the  $m/z$  103 signal increasing when adding NO corresponds to the main product of the alkoxy radical P4, i.e. is predominantly the cyclic product P10c. The large fraction of the signal at  $m/z$  103 present in the absence of NO and the fact that the signal at  $m/z$  85 is unaffected by NO suggests that these signals result from multiple isomers of P10, produced by other pathways. Note that, while  $m/z$  103 also corresponds to the carbonyl product P3 produced directly by RO<sub>2</sub> + RO<sub>2</sub> (C<sub>5</sub>H<sub>8</sub>O-H<sub>3</sub>O<sup>+</sup>) or even to the hydroperoxide from the reaction RO<sub>2</sub>+HO<sub>2</sub> (C<sub>5</sub>H<sub>10</sub>O<sub>2</sub>-H<sup>+</sup>) both compounds would be suppressed by the addition of NO.

## SUPPORTING INFORMATION

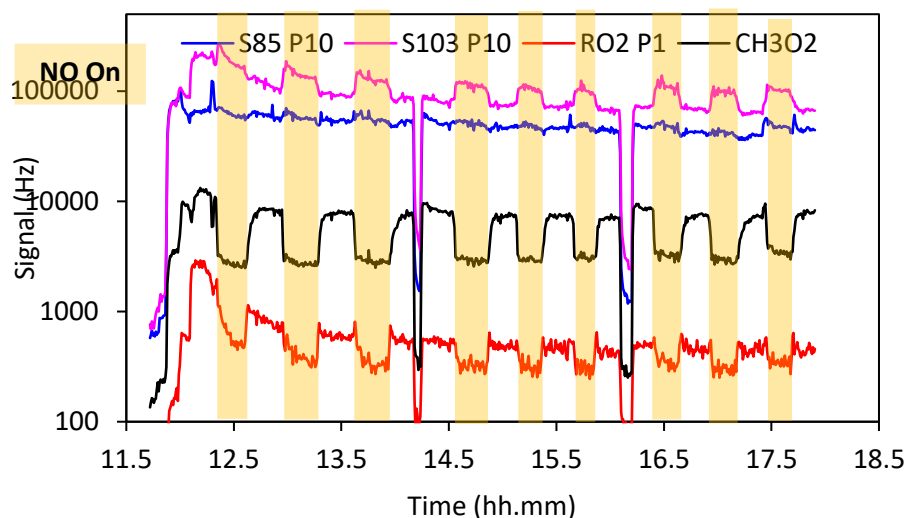

**Figure S6.15:** Dependence of the 1-pentenyl- $O_2$  and cycloether signals on addition of NO in the sampling line. Times where the RO<sub>2</sub> signal goes down correspond to periods with added NO. The Mass 85 signal is barely affected, while the mass 103 signal goes up with NO.

In the reaction chamber, the formation of C<sub>5</sub>H<sub>8</sub>O through alkoxy radical chemistry would primarily be driven by the RO product channel of RO<sub>2</sub>+RO<sub>2</sub> mutual reactions. This would be mainly by alkoxy radicals from P1, with some contributions from P17, where P8 cyclizes quickly and will be present in negligible concentrations. Our current rate coefficients in the kinetic model, however, suggest that these bimolecular reactions may not be important enough to explain the strength of the observed signals. Direct formation of P10 from P5 (“mechanism B”) seems unlikely due to the high energy barrier and the low concentration of P5. The impact of protonated mechanisms (“mechanism F”) cannot be reliably estimated and is purely speculative.

1-hexenyl-O<sub>2</sub> annotated mechanism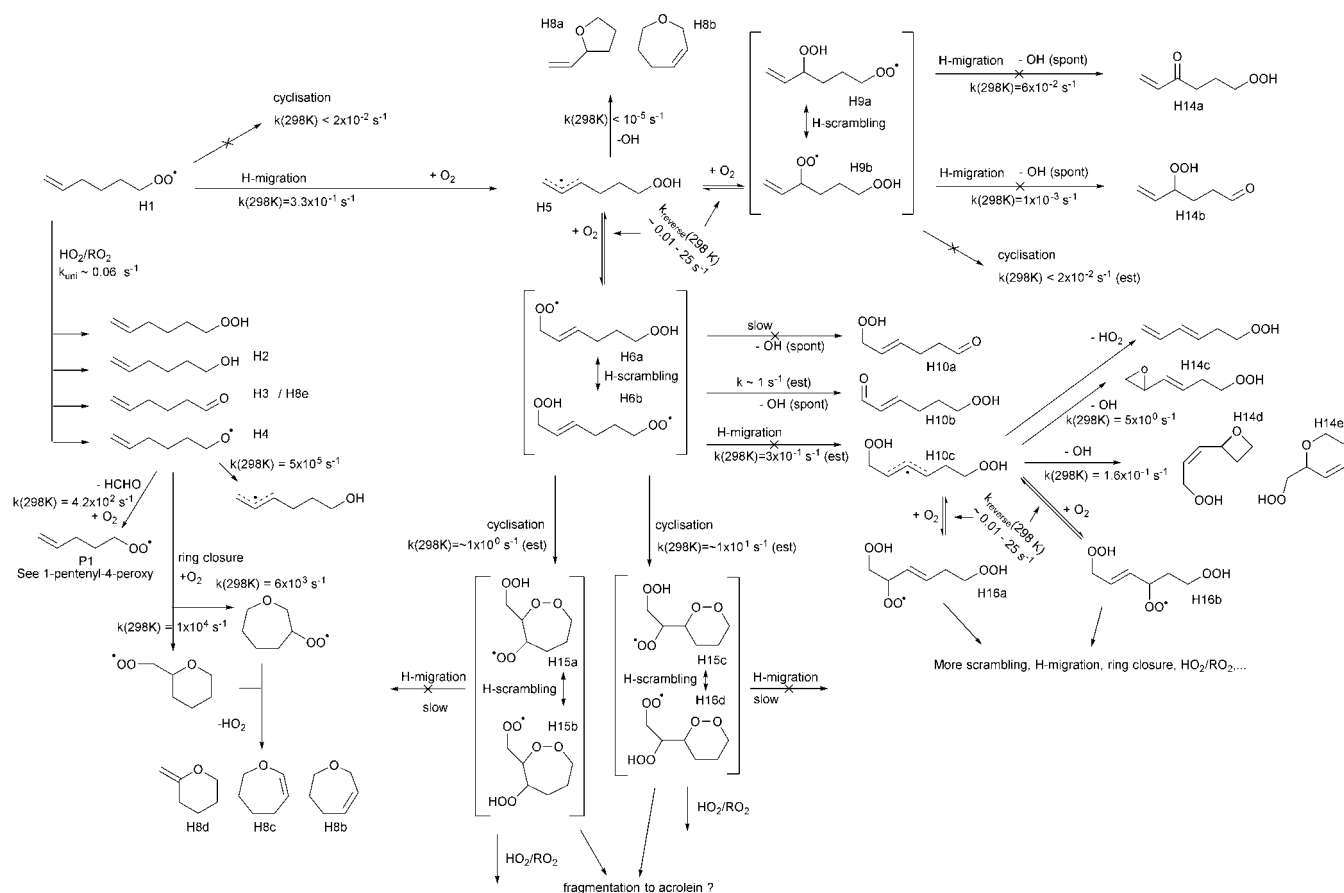

**Figure S6.16:** Extended mechanism for the oxidation of 1-hexenyl-O<sub>2</sub> radicals.

The rate coefficients for unimolecular reactions of 1-hexenyl-O<sub>2</sub> radicals (H1) were calculated in this work (see Table S7.1), where allylic 1,6-H-migration ( $k \sim 3.3 \times 10^{-1} \text{ s}^{-1}$ ) was found to be the dominant loss process. The subsequent chemistry is largely analogous to that following the allyl-1,5-H-migration in 1-pentenyl-O<sub>2</sub>. Due to the reversible O<sub>2</sub> addition on the hydroperoxide allylic radical H5, and the rapid H-scrambling in the resulting HOOQO<sub>2</sub> radicals (H6a, H6b, H9a, H9b), it is expected that these HOOQO<sub>2</sub> radicals equilibrate on a time scale of about a second. The H-migration processes in these radicals are estimated from the SARs by Vereecken and Nozière<sup>5</sup>, where the rate of H-migration of an  $\alpha$ -OOH-substituted, allylic H-atoms is tentatively estimated by combining the impact of each of these separate functionalities on the reaction rate as derived from those SARs. The rate of cyclisation of the unsaturated RO<sub>2</sub> is based on Vereecken et al.<sup>7</sup> Most of the H-migrations are found to be slower than the ring closure reaction. The allylic dihydroperoxide H10c, although remaining a minor channel, has an interesting chemistry showing reversible O<sub>2</sub> addition and scrambling (similar to H5 and P5) as well as several pathways to epoxides, cyclic ethers, and double-unsaturated hydroperoxides. The provided rate coefficients for OH loss are estimated from Møller et al.<sup>15</sup> and Curran et al.<sup>25</sup> The migration of the allylic  $\alpha$ -OOH H-atom in H6b forming H10b is potentially a fast reaction, but likely remains slower than the cyclisation process. Overall, the main loss process for the pool of H6a, H6b, H9a, H9b, and H5 intermediates is ring closure to H15 for which 4 isomers can be formed. The work by Vereecken et al. (2021)<sup>7</sup> on H-migration in cyclic peroxide-peroxy radicals suggests that H-migration of ring-bound H-atoms is likely slow, while the 1,5-H-migrations between substituents are predicted to be non-competitive.<sup>5</sup> As such, the fate of the H15 product, HOO-cQO<sub>2</sub>, is likely determined by HO<sub>2</sub> and RO<sub>2</sub> reactions. Similar to the other cyclisation reaction of unsaturated RO<sub>2</sub> studied in this work, we observe a quantity of acrolein, which we assign to the decomposition of the cycloperoxide moiety. We refer to section S6 for an in-depth discussion on this fragmentation.



## SUPPORTING INFORMATION

Observing the evolution of the main product signals, at  $m/z$  99 and 117, corresponding to  $C_6H_{10}O-H+$  and  $C_6H_{10}O-H_3O^+$ , respectively, and at  $m/z$  81 attributed to their dehydrated ion as NO is periodically added in the sampling line (Fig. S6.2) provides additional information on the mechanisms. Possible formation pathways for these products are discussed in detail in section S6.2 and some are shown in Fig. S6.16 above. As in the analysis of the 1-pentenyl- $O_2$  system we attempted to validate “Mechanism C” for the formation of these  $C_6H_{10}O$  products by observing their variation upon addition of NO in the sampling line (Fig. S6.16). Fig. S6.17 shows that, unlike in the 1-pentenyl- $O_2$  system, the signals for these products are unaffected by shifting the H1 chemistry towards the H4 alkoxy radical, although this channel is expected to produce isomers of the cyclic  $C_6H_{10}O$  products (H8b/c/d). One possible explanation for this is that the amount for H8a/b produced in the absence of NO is exactly compensated by the amount of H8b/c/d produced in the presence of NO, thereby merely shifting the  $C_6H_{10}O$  isomeric distribution without affecting the total concentration. Another, more likely explanation is, however, that the H4 alkoxy radical is not reacting through the cyclisation channel but undergoes an allyl-1,5-H-migration, not forming  $C_6H_{10}O$  products and hence does not increase its concentration in the sampling line. The rate coefficients shown in Fig. S6.16 are estimated by scaling the theoretically calculated 1-pentene- $O_2$  rate coefficients for ring closure and H-migration by a factor derived from the impact of the change in span<sup>5,7</sup> on the rate coefficients of  $RO_2$  ring closure (slowdown by about an order of magnitude and endocyclic allylic H-migration (acceleration by about 5 orders of magnitude). The rate of HCHO remains unchanged compared to P4.<sup>9</sup> This estimate favors allylic H-migration by over an order of magnitude, making additional  $C_6H_{10}O$  formation in the sampling line under the influence of NO negligible; the measured  $C_6H_{10}O$  remains unchanged from that present in the reaction chamber. We interpret this as further corroboration of “mechanism C”. In the reaction chamber, formation of  $C_6H_{10}O$  is unlikely to come through this mechanism starting at P4, however, as the pseudo-first order rate coefficient for bimolecular loss for P1 by  $HO_2/RO_2$  is modelled to be slow compared to the allylic H-migration rate.

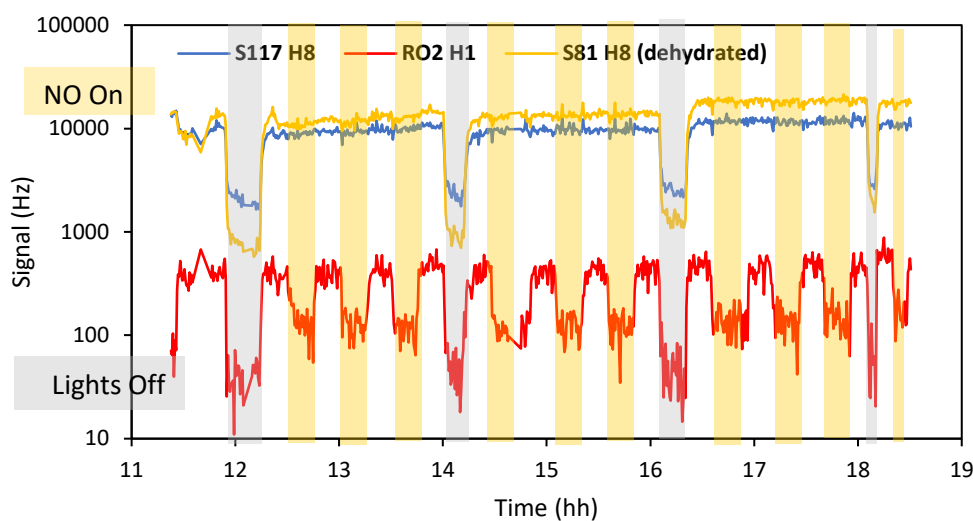

**Figure S6.17:** Dependence of the 1-hexenyl- $O_2$  and cycloether signals on addition of NO in the sampling line. Times where the  $RO_2$  signal goes down correspond to periods with added NO. Neither the 81 nor 117 mass signals seem affected by the NO addition.



2-Me-2-pentenyl-O<sub>2</sub> annotated mechanism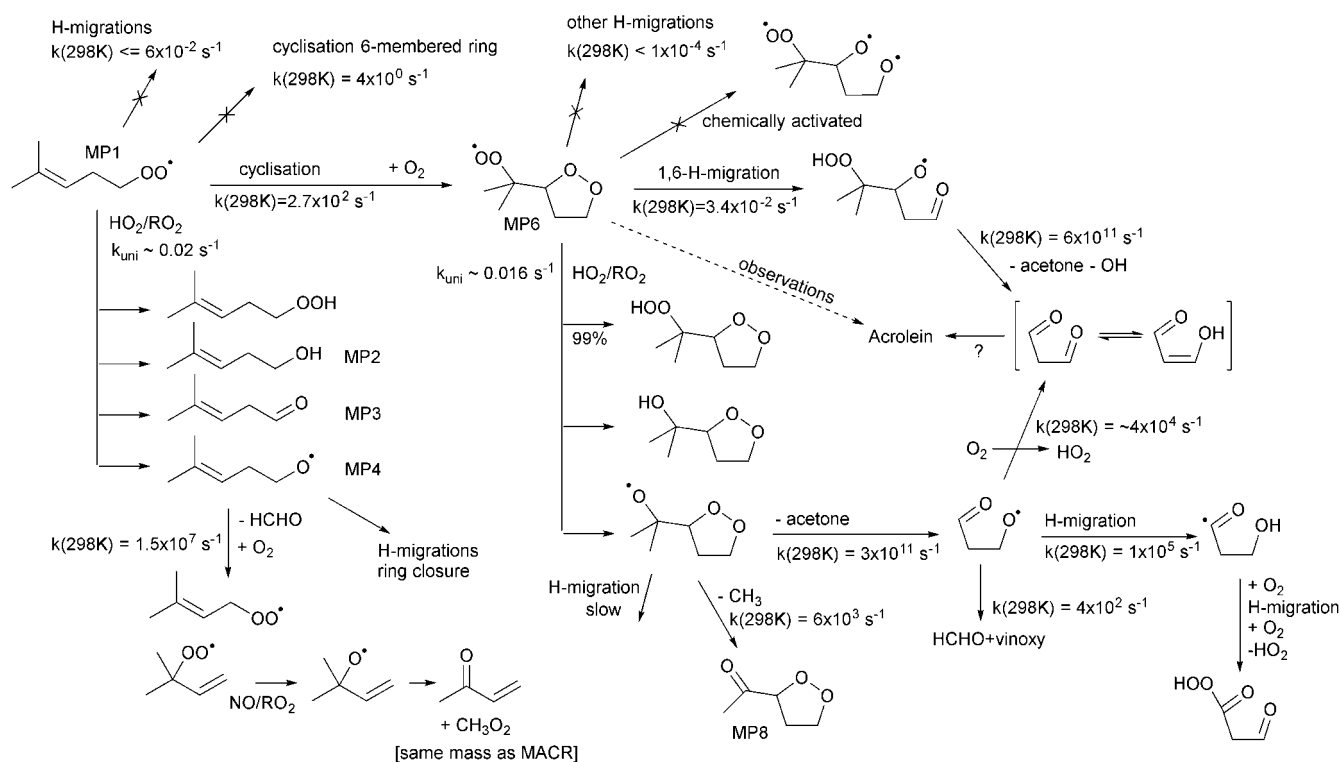

**Figure S6.18:** Extended mechanism for the oxidation of 2-Me-2-pentenyl-O<sub>2</sub> radicals

The rate coefficients for unimolecular reactions of 2-methyl-2-pentenyl-O<sub>2</sub> radicals (MP1) were calculated in this work (see Table S7.1), where the dominant route is cyclisation to a 5-membered peroxide ring. Model calculations estimate the bimolecular loss for the RO<sub>2</sub> by reactions with HO<sub>2</sub>/RO<sub>2</sub> at a pseudo-first order rate coefficient of about  $2.5 \times 10^{-3} \text{ s}^{-1}$ , negligible compared to the unimolecular rate. The cycloperoxide alkyl product formed from MP1 will add O<sub>2</sub>,<sup>7</sup> forming peroxy radical MP6. The study by Vereecken et al.<sup>7</sup> showed no fast unimolecular loss processes for B8, while reactions with RO<sub>2</sub> and HO<sub>2</sub> are modelled to contribute a loss of  $\sim 0.24 \text{ s}^{-1}$ , which is also the dominant loss in the theoretically predicted and modelled loss processes. The observed time evolution for MP6, however, cannot be reproduced unless an additional unimolecular loss process of  $10^6$  to  $10^7 \text{ s}^{-1}$  is added to the mechanism. The expected chemistry also does not show formation pathways to acrolein. We refer to the discussion in section S6 regarding acrolein formation.

## SUPPORTING INFORMATION

## Section S7. Rate coefficients from theoretical calculations

The quantum chemical data for these calculations are available as a textfile in the repository at URL <https://doi.org/10.26165/JUELICH-DATA/ZGIZV3>. This repository contains geometries, rotational constant, vibrational wavenumbers, and energies at various levels of theory.

Table S7.1

Theoretically calculated rate coefficients based on CCSD(T)/aug-cc-pVTZ//M06-2X-D3 quantum chemical data. Shown are the barrier height ( $E_b$ , kcal mol<sup>-1</sup>), rate coefficients at 298 K (s<sup>-1</sup>), and the parameters for the temperature-dependent rate coefficient between 200 and 450 K given as  $k(T) = A \times (T/K)^n \times \exp(-E_a/T)$  with  $A$  in s<sup>-1</sup> and  $E_a$  in K.

| Reactant                                                                                    | Reaction                                                                   | $E_b$                   | $k(298\text{ K})$     | $A$                 | $n$       | $E_a$  |
|---------------------------------------------------------------------------------------------|----------------------------------------------------------------------------|-------------------------|-----------------------|---------------------|-----------|--------|
| CH <sub>2</sub> =CH-CH <sub>2</sub> -CH <sub>2</sub> -OO*                                   | 5-membered ring closure                                                    | 14.1                    | 5.3×10 <sup>0</sup>   | 2.14E+05            | 1.68      | 6013   |
|                                                                                             | 6-membered ring closure                                                    | 16.8                    | 3.1×10 <sup>-2</sup>  | 1.27E+07            | 0.96      | 7547   |
|                                                                                             | Allylic 1,4-H-migration                                                    | 29.4                    | 1.9×10 <sup>-5</sup>  | 1.04E-90            | 31.87     | -4397  |
|                                                                                             | Butadiene + HO <sub>2</sub>                                                | 29.2                    | 5.8×10 <sup>-10</sup> | 1.79E-27            | 12.76     | 9661   |
| CH <sub>2</sub> =CH-CH <sub>2</sub> -CH <sub>2</sub> -CH <sub>2</sub> -OO*                  | 6-membered ring closure                                                    | 16.2                    | 1.6×10 <sup>-1</sup>  | 2.25E+03            | 2.18      | 6559   |
|                                                                                             | 7-membered ring closure                                                    | 18.4                    | 4.7×10 <sup>-3</sup>  | 2.47E+06            | 1.22      | 8060   |
|                                                                                             | Allylic 1,5-H-migration                                                    | 20.3                    | 1.2×10 <sup>-1</sup>  | 2.29E-70            | 25.98     | -3050  |
| CH <sub>2</sub> =CH-CH <sub>2</sub> -CH <sub>2</sub> -CH <sub>2</sub> -CH <sub>2</sub> -OO* | 7-membered ring closure                                                    | 17.9                    | 2.3×10 <sup>-3</sup>  | 5.59E+04            | 1.62      | 7811   |
|                                                                                             | 8-membered ring closure                                                    | 16.3                    | 1.0×10 <sup>-2</sup>  | 1.55E+02            | 2.32      | 6807   |
|                                                                                             | 1,5-H-migration                                                            | 22.5                    | 4.3×10 <sup>-4</sup>  | 5.50E-14            | 7.83      | 6500   |
|                                                                                             | Allylic 1,6-H-migration                                                    | 18.8                    | 3.3×10 <sup>-1</sup>  | 2.66E-62            | 23.07     | -2747  |
|                                                                                             | (CH <sub>3</sub> ) <sub>2</sub> C=CH-CH <sub>2</sub> -CH <sub>2</sub> -OO* | 5-membered ring closure | 12.2                  | 2.7×10 <sup>2</sup> | 6.11E+152 | -49.57 |
| (CH <sub>3</sub> ) <sub>2</sub> C=CH-CH <sub>2</sub> -CH <sub>2</sub> -OO*                  | 6-membered ring closure                                                    | 13.8                    | 3.8×10 <sup>0</sup>   | 1.92E+08            | 0.48      | 6106   |
|                                                                                             | Allylic 1,4-H-migration                                                    | 28.0                    | 9.4×10 <sup>-5</sup>  | 1.58E-91            | 32.31     | -4690  |
|                                                                                             | Allylic 1,7-H-migration (syn-CH <sub>3</sub> )                             | 20.0                    | 6.1×10 <sup>-2</sup>  | 3.54E-58            | 21.54     | -2022  |
|                                                                                             | Allylic 1,7-H-migration (anti-CH <sub>3</sub> )                            | 34.3                    | 6.3×10 <sup>-10</sup> | 6.30E-105           | 35.80     | -4417  |
|                                                                                             | 4-methylpentadiene + HO <sub>2</sub>                                       | 29.6                    | 7.3×10 <sup>-10</sup> | 1.04E-26            | 12.53     | 9719   |
| C*H <sub>2</sub> -CH <sub>2</sub> -CH <sub>2</sub> -CH <sub>2</sub> OOH                     | Cyclic ether + OH (5-membered ring)                                        | 13.8                    | 5.4×10 <sup>1</sup>   | 9.71E-05            | 4.79      | 4183   |
| CH <sub>2</sub> =CH-C*H-CH <sub>2</sub> -CH <sub>2</sub> OOH                                | Cyclic ether + OH (4-membered ring)                                        | 25.9                    | 1.7×10 <sup>-7</sup>  | 5.69E-71            | 27.57     | 3299   |
|                                                                                             | Cyclic ether + OH (6-membered ring)                                        | 28.3                    | 8.9×10 <sup>-10</sup> | 2.18E-36            | 15.29     | 7707   |
| O=CH-CH <sub>2</sub> -CH <sub>2</sub> O*                                                    | 1,4-H-migration                                                            | 10.4                    | 1.2×10 <sup>5</sup>   | 1.03E-13            | 7.99      | 1172   |

## SUPPORTING INFORMATION

**Table S7.2.**

Theoretically calculated rate coefficients based on M06-2X-D3/aug-cc-pVTZ quantum chemical data. Shown are the barrier height ( $E_b$ , kcal mol<sup>-1</sup>), rate coefficients at 298 K (s<sup>-1</sup>), and the parameters for the temperature-dependent rate coefficient between 200 and 450 K given as  $k(T) = A \times (T/K)^n \times \exp(-E_a/T)$  with  $A$  in s<sup>-1</sup> and  $E_a$  in K.

| Reactant                                                                                              | Reaction                                                 | $E_b$ | $k(298\text{ K})$     | $A$      | $n$   | $E_a$ |
|-------------------------------------------------------------------------------------------------------|----------------------------------------------------------|-------|-----------------------|----------|-------|-------|
| $[\text{CH}_2=\text{CH}_2-\text{C}^*\text{H}-\text{CH}_2-\text{CH}_2\text{O}^*-\text{H}_2\text{O}]^+$ | Cyclic ether + H <sub>2</sub> O cation (4-membered ring) | 3.4   | $1.1 \times 10^{10}$  | 6.50E+12 | -0.1  | 172   |
| $\text{CH}_2=\text{CH}-\text{CH}_2-\text{CH}_2-\text{CH}_2\text{O}^*$                                 | Allylic 1,4-H-migration                                  | 17.9  | $2.1 \times 10^0$     | 1.48E-59 | 22.70 | -2049 |
|                                                                                                       | 5-membered ring closure                                  | 7.9   | $4.4 \times 10^5$     | 6.34E+09 | 0.32  | 3398  |
|                                                                                                       | 6-membered ring closure                                  | 8.7   | $6.2 \times 10^4$     | 3.16E+11 | -0.39 | 3943  |
|                                                                                                       | Concerted HO <sub>2</sub> elimination                    | 37.1  | $1.4 \times 10^{-15}$ | 6.59E-46 | 18.85 | 11203 |
|                                                                                                       | 1,4-H-migration                                          | 28.2  | $1.2 \times 10^{-6}$  | 6.18E-85 | 30.67 | -1639 |
|                                                                                                       | Unsaturated cyclic ether + HO <sub>2</sub>               | 14.3  | $4.7 \times 10^1$     | 2.60E+07 | 1.74  | 6891  |
|                                                                                                       | Concerted HO <sub>2</sub> elimination (β-OR side)        | 35.3  | $9.6 \times 10^{-14}$ | 5.69E-42 | 17.79 | 10850 |
|                                                                                                       | Concerted HO <sub>2</sub> elimination (alkyl side)       | 34.4  | $3.5 \times 10^{-13}$ | 4.62E-17 | 9.54  | 13537 |
|                                                                                                       | 1,4-H-migration (β-OR side)                              | 31.1  | $2.2 \times 10^{-8}$  | 5.65E-83 | 30.17 | 29    |
|                                                                                                       | 1,4-H-migration (alkyl side)                             | 35.1  | $1.4 \times 10^{-10}$ | 4.19E-69 | 25.24 | 2701  |
|                                                                                                       | Unsaturated cyclic ether + HO <sub>2</sub>               | 15.3  | $1.1 \times 10^2$     | 1.83E+12 | 0.37  | 7620  |
|                                                                                                       | Unsaturated cyclic ether + HO <sub>2</sub>               | 16.5  | $1.3 \times 10^0$     | 3.04E-03 | 5.10  | 6870  |
|                                                                                                       | Cyclisation (6-membered ring)                            | 10.2  | $3.7 \times 10^4$     | 1.32E+18 | -2.46 | 5115  |
|                                                                                                       | Unsaturated cyclic ether + HO <sub>2</sub>               | 17.3  | $1.5 \times 10^0$     | 6.45E+06 | 2.10  | 8106  |
|                                                                                                       | Epoxidized cyclic ether + OH                             | 15.4  | $1.8 \times 10^1$     | 2.99E-08 | 6.51  | 5041  |

## Section S8. References

1. Keller-Rudek, H.; Moortgat, G.; Sander, R.; Sørensen, R., The mpi-mainz uv/vis spectral atlas of gaseous molecules of atmospheric interest. *Earth System Science Data* **2013**, *5*, 365-373.
2. Atkinson, R.; Baulch, D.; Cox, R.; Crowley, J.; Hampson, R.; Hynes, R.; Jenkin, M.; Rossi, M.; Troe, J.; Subcommittee, I., Evaluated kinetic and photochemical data for atmospheric chemistry: Volume ii—gas phase reactions of organic species. *Atmos. Chem. Phys.* **2006**, *6*, 3625-4055.
3. Atkinson, R.; Baulch, D.; Cox, R. A.; Crowley, J.; Hampson, R.; Hynes, R.; Jenkin, M.; Rossi, M.; Troe, J., Evaluated kinetic and photochemical data for atmospheric chemistry: Volume i—gas phase reactions of ox, hox, nox and sox species. *Atmos. Chem. Phys.* **2004**, *4*, 1461-1738.
4. Jenkin, M. E.; Valorso, R.; Aumont, B.; Rickard, A. R., Estimation of rate coefficients and branching ratios for reactions of organic peroxy radicals for use in automated mechanism construction. *Atmos. Chem. Phys.* **2019**, *19*, 7691-7717.
5. Vereecken, L.; Nozière, B., H migration in peroxy radicals under atmospheric conditions. *Atmos. Chem. Phys.* **2020**, *20*, 7429-7458.
6. Atkinson, R.; Baulch, D.; Cox, R.; Crowley, J.; Hampson, R.; Hynes, R.; Jenkin, M.; Rossi, M.; Troe, J., Evaluated kinetic and photochemical data for atmospheric chemistry: Volume iii—gas phase reactions of inorganic halogens. *Atmos. Chem. Phys.* **2007**, *7*, 981-1191.
7. Vereecken, L.; Vu, G.; Wahner, A.; Kiendler-Scharr, A.; Nguyen, H., A structure activity relationship for ring closure reactions in unsaturated alkylperoxy radicals. *Phys. Chem. Chem. Phys.* **2021**, *23*, 16564-16576.
8. Burkholder, J.; Sander, S.; Abbatt, J.; Barker, J.; Cappa, C.; Crouse, J.; Dibble, T.; Huie, R.; Kolb, C.; Kurylo, M. *Chemical kinetics and photochemical data for use in atmospheric studies; evaluation number 19*; Pasadena, CA: Jet Propulsion Laboratory, National Aeronautics and Space ...: 2020.
9. Vereecken, L.; Peeters, J., Decomposition of substituted alkoxy radicals—part i: A generalized structure–activity relationship for reaction barrier heights. *Phys. Chem. Chem. Phys.* **2009**, *11*, 9062-9074.
10. Novelli, A.; Cho, C.; Fuchs, H.; Hofzumahaus, A.; Rohrer, F.; Tillmann, R.; Kiendler-Scharr, A.; Wahner, A.; Vereecken, L., Experimental and theoretical study on the impact of a nitrate group on the chemistry of alkoxy radicals. *Phys. Chem. Chem. Phys.* **2021**, *23*, 5474-5495.
11. Vereecken, L.; Nguyen, T. L.; Hermans, I.; Peeters, J., Computational study of the stability of  $\alpha$ -hydroperoxyl- or  $\alpha$ -alkylperoxyl substituted alkyl radicals. *Chem. Phys. Lett.* **2004**, *393*, 432-436.
12. Villano, S. M.; Huynh, L. K.; Carstensen, H.-H.; Dean, A. M., High-pressure rate rules for alkyl+ o<sub>2</sub> reactions. 2. The isomerization, cyclic ether formation, and  $\beta$ -scission reactions of hydroperoxy alkyl radicals. *J. Phys. Chem. A* **2012**, *116*, 5068-5089.
13. Bugler, J.; Power, J.; Curran, H. J., A theoretical study of cyclic ether formation reactions. *Proceedings of the Combustion Institute* **2017**, *36*, 161-167.
14. Miyoshi, A., Systematic computational study on the unimolecular reactions of alkylperoxy (ro<sub>2</sub>), hydroperoxyalkyl (qooh), and hydroperoxyalkylperoxy (o<sub>2</sub>qooh) radicals. *J. Phys. Chem. A* **2011**, *115*, 3301-3325.
15. Møller, K. H.; Kurtén, T.; Bates, K. H.; Thornton, J. A.; Kjaergaard, H. G., Thermalized epoxide formation in the atmosphere. *J. Phys. Chem. A* **2019**, *123*, 10620-10630.
16. Novelli, A.; Vereecken, L.; Bohn, B.; Dorn, H.-P.; Gkatzelis, G. I.; Hofzumahaus, A.; Holland, F.; Reimer, D.; Rohrer, F.; Rosanka, S., Importance of isomerization reactions for oh radical regeneration from the photo-oxidation of isoprene investigated in the atmospheric simulation chamber saphir. *Atmos. Chem. Phys.* **2020**, *20*, 3333-3355.
17. Goldman, M. J.; Green, W. H.; Kroll, J. H., Chemistry of simple organic peroxy radicals under atmospheric through combustion conditions: Role of temperature, pressure, and nox level. *J. Phys. Chem. A* **2021**, *125*, 10303-10314.

## SUPPORTING INFORMATION

18. Rienstra-Kiracofe, J. C.; Allen, W. D.; Schaefer, H. F., The  $\text{C}_2\text{H}_5 + \text{O}_2$  reaction mechanism: High-level ab initio characterizations. *J. Phys. Chem. A* **2000**, *104*, 9823-9840.
19. Orlando, J. J.; Tyndall, G. S.; Wallington, T. J., The atmospheric chemistry of alkoxy radicals. *Chem. Rev.* **2003**, *103*, 4657-4690.
20. Davis, A. C.; Francisco, J. S., Ab initio study of hydrogen migration in 1-alkylperoxy radicals. *J. Phys. Chem. A* **2010**, *114*, 11492-11505.
21. Davis, A. C.; Francisco, J. S., Ab initio study of hydrogen migration across n-alkyl radicals. *J. Phys. Chem. A* **2011**, *115*, 2966-2977.
22. Nozière, B.; Vereecken, L., Direct observation of aliphatic peroxy radical autoxidation and water effects: An experimental and theoretical study. *Angew. Chem. Int. Ed.* **2019**, *58*, 13976-13982.
23. Winkelman, J.; Voorwinde, O.; Ottens, M.; Beenackers, A.; Janssen, L., Kinetics and chemical equilibrium of the hydration of formaldehyde. *Chem. Eng. Sci.* **2002**, *57*, 4067-4076.
24. Medeiros, D. J.; Blitz, M. A.; Seakins, P. W.; Whalley, L. K., Direct measurements of isoprene autoxidation: Pinpointing atmospheric oxidation in tropical forests. *JACS Au* **2022**, *2*, 809-818.
25. Curran, H. J.; Gaffuri, P.; Pitz, W. J.; Westbrook, C. K., A comprehensive modeling study of n-heptane oxidation. *Combust. Flame* **1998**, *114*, 149-177.
